1 **Kinetics of the immune response to *Eimeria maxima* in relatively resistant and susceptible**  
2 **chicken lines.**

3

4 Abi Bremner<sup>1</sup>, Sungwon Kim<sup>1a</sup>, Katrina Morris<sup>1</sup>, Matthew J. Nolan<sup>2</sup>, Dominika Borowska<sup>1</sup>, Zhiguang  
5 Wu<sup>1</sup>, Fiona Tomley<sup>2</sup>, Damer P. Blake<sup>2</sup>, Rachel Hawken<sup>3</sup>, Pete Kaiser<sup>1</sup>, and Lonneke Vervelde<sup>1\*</sup>

6

7 <sup>1</sup>Infection and Immunity, The Roslin Institute and R(D)SVS, University of Edinburgh, Easter Bush,  
8 Midlothian, UK

9 <sup>2</sup>Department of Pathobiology and Population Sciences, Royal Veterinary College, North Mymms,  
10 Hertfordshire, UK

11 <sup>3</sup>Cobb-Vantress Inc., Siloam Springs, USA

12 <sup>a</sup> Current address 2

13 Running title: Resistance to *Eimeria maxima*

14

15 \* Correspondence: Prof. Lonneke Vervelde, [Lonneke.vervelde@roslin.ed.ac.uk](mailto:Lonneke.vervelde@roslin.ed.ac.uk)

16

17 Keywords: Eimeria, immune response, genetic resistance, interleukin-10, interferon

18

19

20 **Abstract**

21 *Eimeria maxima* is a common cause of coccidiosis in chickens, a disease which has a huge economic  
22 impact on poultry production. Knowledge of immunity to *E. maxima* and the specific mechanisms  
23 that contribute to differing levels of resistance observed between chicken breeds and between  
24 congenic lines derived from a single breed of chickens is required. This study aimed to define  
25 differences in the kinetics of the immune response of two inbred lines of White Leghorn chickens that  
26 exhibit differential resistance (line C.B12) or susceptibility (line 15I) to infection by *E. maxima*. Line  
27 C.B12 and 15I chickens were infected with *E. maxima* and transcriptome analysis of infected jejunal  
28 tissue was carried out at 2, 4, 6 and 8 days post-infection (dpi). RNA-Seq analysis revealed  
29 differences in the rapidity and magnitude of cytokine transcription responses post-infection between  
30 the two lines. In particular, IFN- $\gamma$  and IL-10 transcripts in the jejunum accumulated earlier in line  
31 C.B12 (at 4 dpi) compared to line 15I (at 6 dpi). Line C.B12 chickens exhibited increases of *IFNG*  
32 and *IL10* mRNA in the jejunum at 4 dpi, whereas in line 15I transcription was delayed but increased  
33 to a greater extent. RT-qPCR and ELISAs confirmed the results of the transcriptomic study. Higher  
34 serum IL-10 correlated strongly with higher *E. maxima* replication in line 15I compared to line C.B12  
35 chickens. Overall, the findings suggest early induction of the IFN- $\gamma$  and IL-10 responses, as well as  
36 immune-related genes at 4 dpi identified by RNA-Seq, may be key to resistance to *E. maxima*.

## 37 **Introduction**

38 Coccidiosis, which in poultry is caused by apicomplexan parasites of the genus *Eimeria*, causes huge  
39 economic losses to the global poultry industry through decreased feed efficiency, reduced weight gain,  
40 increased mortality, and the cost of prophylaxis and therapy. It is the most economically important  
41 parasitic condition of poultry (1, 2). One of seven *Eimeria* species that can infect chickens, *Eimeria*  
42 *maxima* is commonly diagnosed in commercial chicken flocks (3, 4) and specifically invades and  
43 parasitizes enterocytes of the jejunum where it can cause pathological lesions, resulting in villus  
44 destruction and malabsorptive disease symptoms (5). Currently, control of *Eimeria* is primarily  
45 achieved through in-feed prophylaxis with anti-coccidial drugs or by vaccination with live, or live-  
46 attenuated parasites. However, resistance to anticoccidial drugs is common (6) and vaccination is  
47 complex, requiring the preparation and administration of admixtures of between three and eight  
48 different lines of parasite to confer adequate protection against field challenge (7). A potential  
49 alternative method of control could be to selectively breed chickens that have enhanced resistance to  
50 *Eimeria*; however, this requires knowledge of the natural host immune response to *Eimeria* and the  
51 identification of biomarkers of resistance.

52 Understanding the immunological basis of resistance to *Eimeria* is an important step towards  
53 identifying biomarkers of resistance for the selection of relatively resistant individuals within  
54 commercial breeding stocks. Inbred lines 15I (MHC type B<sup>15</sup>) and C.B12 (MHC type B<sup>12</sup>) are White  
55 Leghorn chickens which display differential resistance and susceptibility to *E. maxima* based on  
56 oocyst output. Following primary infection line C.B12 chickens shed fewer oocysts compared to line  
57 15I, but both lines display complete immune protection against homologous secondary infection after  
58 which no oocysts are produced (8, 9). Additionally, two-fold higher levels of *E. maxima* DNA have  
59 been detected in the intestinal tissue of line 15I compared to line C.B12 chickens at 5 days post-  
60 infection (dpi) (10). Another study reported that line FP (MHC type B<sup>15</sup>/B<sup>21</sup>) chickens produce more  
61 oocysts than line SC (MHC type B<sup>2</sup>) chickens after infection with *E. maxima* (11). Although these  
62 chicken lines were bred for specific MHC types, the immunological basis underlying resistance and  
63 susceptibility to *E. maxima* is not well characterized.

64 Following *E. maxima* infection, cell-mediated immunity and host genetic variation in T-cell responses  
65 appear to be central to the induction of protective immunity (8, 12). Although parasite-specific  
66 antibodies can protect against *E. maxima* infection, (13, 14, 15), bursectomised (B-cell deficient)  
67 chickens were no more susceptible to *E. maxima* challenge than non-bursectomised control birds (16),  
68 suggesting that antibodies are not necessary for elimination of the parasite. An array of cell-mediated  
69 responses are a prominent feature of coccidiosis and attempts have been made to correlate these  
70 responses with immunity. Primary *E. maxima* infection leads to an increased percentage of CD8 and  
71  $\gamma\delta$  T cells in peripheral blood leukocytes (PBL) in relatively resistant (line C) chickens compared to  
72 relatively susceptible (line 15I and 6<sub>1</sub>) chickens, whereas there was no significant difference in CD4  
73 and  $\alpha\beta 2$  T cells between these lines of chickens (8). On the other hand, increased numbers of CD4  
74 lamina propria lymphocytes (LPL), but not intraepithelial lymphocytes (IEL), were observed in  
75 relatively susceptible Light Sussex chickens at 3 dpi (17), while CD8 LPL and IEL were increased at  
76 4 dpi (18). Overall, there were more CD8 than CD4 cells within the gut during *E. maxima* infection  
77 (8, 18). During *E. maxima* infection, significantly increased  $\gamma\delta$  and  $\alpha\beta 1$  T cells were reported in the  
78 epithelium at later time points (11 dpi), while  $\alpha\beta 2$  T cells in the lamina propria increased at 4 and 11  
79 dpi (18, 19), although there was induction time variation dependent on the genetic background of the  
80 chickens and the nature of the challenge dose.

81 Interferon (IFN)- $\gamma$ , a key signature cytokine of Th1-controlled immune responses, is a major cytokine  
82 mediating a protective immune response against many intracellular pathogens including viruses (20,  
83 21), *Salmonella* spp. (22) and *Eimeria* spp. (23, 24). Early studies showed that increased serum IFN- $\gamma$   
84 protein and gut *IFNG* mRNA levels are strongly associated with *E. acervulina* (24, 25), *E. maxima*  
85 (15) and *E. tenella* (26) infection. During *E. maxima* infection, significantly increased IFN- $\gamma$  protein  
86 was observed in both the gut and serum of relatively susceptible (line SC) chickens, and serum IFN- $\gamma$   
87 levels are positively correlated with faecal oocyst shedding (15). Additionally, *E. maxima* infection  
88 leads to induction of *IFNG* mRNA levels in the IEL population of relatively susceptible (line SC)

89 chickens during primary infection, but not secondary infection (19), implicating the importance of  
90 IFN- $\gamma$  in the cellular immune response to primary *Eimeria* spp. infection.

91 Interleukin (IL)-10 is an anti-inflammatory and regulatory cytokine and is important in balancing  
92 inflammatory responses to pathogens. During the characterization of biological roles of chicken IL-  
93 10, its potential role as a biomarker for *Eimeria* spp. infection was suggested. Increased *IL10* mRNA  
94 levels were observed in the spleen and the small intestine of relatively susceptible (line 15I) chickens  
95 during *E. maxima* infection compared to non-infected chickens, but not in relatively resistant (line  
96 C.B12) chickens (27). Moreover, uninfected relatively susceptible chickens had significantly higher  
97 *IL10* mRNA levels in the spleen compared to relatively resistant chickens (27), suggesting that levels  
98 of constitutive IL-10 expression may be dependent on host genetics. Further studies showed  
99 increased *IL10* mRNA levels in the liver and caecum (28) and IL-10 protein in the serum (29) during  
100 *E. tenella* infection. Furthermore, antibody-mediated depletion of luminal IL-10 reduced oocyst  
101 shedding in broilers given an attenuated *Eimeria* spp. vaccine (30).

102 The present study aimed to characterise in detail the kinetics of the immune responses of relatively  
103 resistant (line C.B12) and susceptible (line 15I) inbred chickens to *E. maxima* infection. To identify  
104 phenotypes that associate with resistance to *E. maxima*, we investigated differences in gene  
105 expression and the systemic and local kinetics of the IFN- $\gamma$ , and IL-10 response between the two lines.  
106 Transcriptomic analysis revealed that interferon-mediated immune responses were induced in line  
107 C.B12 chickens at 4 dpi compared to the relatively susceptible line 15I chickens at 6 dpi. Both *IFNG*  
108 and *IL10* were expressed in similar patterns during the course of infection in each line. Line C.B12  
109 chickens produced higher levels of IFN- $\gamma$  and IL-10 proteins in the jejunum and serum until 5 dpi  
110 compared to line 15I chickens, whereas by 6-8 dpi line 15I chickens produced higher levels of both.  
111 We also found that IFN- $\gamma$  and IL-10 protein expression and mRNA transcription was highly  
112 correlated with parasite burden, with the strongest correlation between parasitaemia and serum IL-10  
113 in line 15I chickens.

114

115 **Results**

116 *Comparison of body weight gain and E. maxima load between relatively resistant and susceptible*  
117 *chickens*

118 To examine the impact of *E. maxima* infection on the growth of line C.B12 (relatively resistant) and  
119 line 15I (relatively susceptible) chickens, the percentage weight gains were calculated for individual  
120 birds from 2 days prior to *E. maxima* infection to the time of culling (Figure 1A). *E. maxima*  
121 infection did not affect body weight gain (BWG) compared to control birds and there was no  
122 difference between the two lines during the course of the experiment. The low challenge dose did not  
123 result in lesions in the gut of either line.

124 *E. maxima* genome copy numbers sharply increased at 6 dpi to similar levels in both lines of birds  
125 (Figure 1B). Thereafter the genome copy numbers decreased in both lines but was significantly  
126 higher in the jejunum of line 15I compared with line C.B12 chickens at 7 and 8 dpi. By 13 dpi, no  
127 difference in *E. maxima* genome copy number was apparent between the two lines. *Eimeria* genomes  
128 remained detectable one day later in relatively susceptible line 15I chickens.

129

130 *Comparison of global kinetic gene expression profiles between relatively resistant and susceptible*  
131 *chickens during E. maxima infection*

132 To explore host responses to *E. maxima* infection and the genetics underlying the relative differences  
133 in resistance and susceptibility between line C.B12 and 15I chickens, transcriptome analysis was  
134 performed. Differentially expressed genes (DEGs) were identified within the jejunum anterior to  
135 Meckel's diverticulum, site of peak *E. maxima* replication, between control and infected chickens of  
136 each line at 2, 4, 6 and 8 dpi under the following conditions: False Discovery Ratio (FDR) < 0.05 and  
137 log(Fold Change (FC)) > 1.6 (Table 1: Table S1 and S2). Line 15I chickens showed very little  
138 response at 2 dpi (5 DEGs) and 4 dpi (3 DEGs), but had a large number of DEGs at 6 dpi (1124  
139 DEGs). In contrast, line C.B12 had already established a substantial response by 4 dpi (177 DEGs),

140 but also demonstrated a peak response at 6 dpi (666 DEGs). In line C.B12, 42.2% and 26.8% of the  
141 DEGs were immune-related in function at 4 and 6 dpi, respectively. In line 15I, there was no  
142 differential expression in immune-related genes at 4 dpi, while 29.2% of DEGs at 6 dpi were immune-  
143 related. Immune genes upregulated strongly in both lines at day 6 included *IFNG*, chemokines and  
144 complement components. Analysis using the Markov clustering algorithm indicated that samples  
145 from line C.B12 at 6 dpi and line 15I at 8 dpi were the furthest distance from controls, indicating that  
146 globally the peak responses may occur at these times (Figure 2A). A network graph of unbiased  
147 gene-to-gene clustering was constructed (Figure 2B and Table S3). Out of 12 clusters, cluster 5  
148 revealed a set of 163 genes (Figure 2C), which included *IFNG* and *IL10*, that were strongly elevated  
149 at 6 dpi in both lines of chickens, but also earlier at 4 dpi in line C.B12 chickens. Further functional  
150 analysis revealed that genes of this cluster are mainly involved in interferon signalling, the Th1  
151 pathway, and the Th1 and Th2 activation pathways. Genes in Cluster 5 included the IFN- $\alpha/\beta$  receptor  
152 (*IFNAR*), *IFNG*, interferon regulatory factor (*IRF*), protein tyrosine phosphatase (*PTPN2*), suppressor  
153 of cytokine signalling 1 and 2 (*STAT1* and *STAT2*), transporter 1 ATP binding cassette (*TAP1*;  
154 participates in the interferon signalling pathway), *CD80*, *CD274*, delta like canonical Notch ligand 4  
155 (*DLL4*), *IL10*, *IL12A* (participates in the Th1 pathway and Th1 and Th2 activation pathways), C-C  
156 motif chemokine ligand 1 (*CCL1*), *CCLA*, complement components 1s (*C1S*), *C1R* and genes involved  
157 in the JAK-STAT cascade.

158

### 159 *Kinetics of differential gene expression in relatively resistant and susceptible chickens*

160 At 2 and 4 dpi, *E. maxima*-infected line 15I chickens had only 5 and 3 significant DEGs respectively,  
161 compared to control birds, although none of these were immune-related (Table 1). At 6 dpi, the  
162 largest increase in the expression of immune-related genes in line 15I was observed with 25% of  
163 upregulated genes with known functions having immune roles (Table 1). The pathways associated  
164 with the response of line 15I chickens at 6 dpi were primarily involved in T cell differentiation  
165 including differentiation into Th1 and Th2 subsets (Figure 3A). Gene ontology (GO) term enrichment

166 analysis also highlighted the IL-21, IL-2 and IFN- $\gamma$  pathways (Table S4). The highest upregulated  
167 protein coding genes were a complement receptor (homolog of *CR1*), *IFNG* and a gene involved in  
168 lipid metabolism (*ELOVL3*). Significant upregulation of immune-related genes were still observed at  
169 8 dpi in line 15I, with 14.8% of 638 DEGs being immune-related. Upregulated genes at 8 dpi are  
170 involved in the complement and cell replication pathways, while genes associated with coagulation  
171 were downregulated (Figure 3B, Table S4). *IFNG* and *IL10* continued to be significantly upregulated  
172 at 8 dpi, and chemokines *CCL26* and *chCCLi7* were highly upregulated.

173 In comparison with relatively susceptible (line 15I) chickens, relatively resistant (line C.B12)  
174 chickens developed immune responses to *E. maxima* infection as early as 2 and 4 dpi. A total of 13  
175 DEGs were identified between *E. maxima*-infected line C.B12 compared to non-infected chickens at 2  
176 dpi (Table 1). Of these genes, most of those which were upregulated were associated with  
177 erythrocytes. At 4 dpi in line C.B12, 42% of 177 DEGs were immune-related genes (Table 1).  
178 Further functional analysis revealed that genes involved in the interferon signalling and Th1 pathways  
179 were strongly upregulated (Figure 3C) including: interferon-induced protein with tetratricopeptide  
180 repeats 1 (*IFIT1*), MX dynamin GTPase 1 (*MX1*, participates in the interferon signalling pathway),  
181 *CD274*, suppressor of cytokine signalling 3 (*SOCS3*, participates in Th1 pathway), *IFNG*, *SOCS1* and  
182 signal transducer and activator of transcription 1 (*STAT1*, participates in both pathways). GO term  
183 enrichment analysis indicated genes associated with T cell activity, the IFN- $\gamma$  pathway, the JAK-  
184 STAT cascade and response to virus were strongly upregulated (Table S5). The highest upregulated  
185 protein coding genes were *IFNG*, a homolog of lysozyme-G (ENSGALG00000044778), *CCL4* and  
186 GTPase, very large interferon inducible pseudogene 1 (*GVINP1*). Some of the upregulated interferon-  
187 stimulated genes such as radical S-adenosyl methionine domain containing 2 (*RSAD2*), *IFIT1*, *MX1*  
188 and 2'-5'-oligoadenylate synthetase like (*OASL*) were not significantly upregulated at any time point  
189 in line 15I chickens (Table S1). At 6 dpi, interferon and T-cell related genes continued to be  
190 upregulated in line C.B12, with the highest peak of *IFNG* and *IL10* expression observed (Figure 3D,  
191 Table S2). By 8 dpi, the response of line C.B12 chickens had subsided with only 172 DEGs (Table 1).  
192 These genes were varied and no significantly enriched GO terms were identified. Ingenuity pathway



193 analysis revealed that only the coagulation pathway – regulated by fibrinogen gamma (*FGG*),  
194 kininogen 1 (*KNG1*), plasminogen (*PLG*) – was significantly downregulated in line C.B12 at 8 days  
195 post *E. maxima* infection.

196

#### 197 *Comparison of the immune responses between line C.B12 and line 15I chickens*

198 To directly compare the response to infection in the two chicken lines, the DEGs with the highest  
199 mean difference in logFC during *E. maxima* infection between the lines were examined, and the top  
200 50 were plotted in a heatmap (Figure 4A). DEGs uniquely upregulated in line 15I included cytokines  
201 and genes associated with chemotaxis (TNF receptor superfamily member 13C (*TNFRSF13C*), C-X-C  
202 motif chemokine ligand 13 (*CXCL13*), chemokine ah221 (*CCL9*) and Pre-B lymphocyte protein 3  
203 (*VPREB3*). A group of interferon-stimulated viral response genes (*IFIT5*, *RSAD2*, *MX1*, *OASL* and  
204 ubiquitin specific peptidase 18 (*USP18*) were upregulated at 4 and 6 dpi in line C.B12 but not line 15I  
205 chickens, further highlighting that this pathway is responding at a relatively higher level in line C.B12  
206 compared to line 15I chickens. An additional group of genes was strongly upregulated in line C.B12  
207 at 6 dpi only. Many of these genes are involved in epidermis development (keratin 75 (*KRT75*),  
208 *KRT15*, *KRT12*, ALX homeobox 4 (*ALX4*), homeobox B13 (*HOXB13*), suggesting that tissue repair is  
209 occurring at this time point in line C.B12, but may be delayed in line 15I.

210 To further investigate the differences between the two chicken lines, we compared pathways enriched  
211 in each line using IPA software (Figure 4B). This highlighted commonalities and differences between  
212 the responses of the lines. The coagulation pathway was downregulated in both lines at 6 and 8 dpi,  
213 while genes associated with cell cycle regulation were uniquely downregulated in line 15I. The Th2  
214 and the Tec kinase signalling pathways were upregulated in both lines at 6 dpi, as was interferon  
215 signalling, although the latter pathway was significantly enriched already at 4 dpi in line C.B12  
216 chickens. Pathways that showed a stronger enrichment in line 15I compared to C.B12 chickens  
217 included the Th1, T helper cell and complement pathways. Analysis of the predicted upstream  
218 regulators revealed that both chicken lines share many of the same upstream regulators including

219 *IFNG*, *CSF2* and vascular endothelial growth factor A (*VEGF*) although the activation of these  
220 generally occurred at 4 and 6 dpi in line C.B12 and at 6 and 8 dpi in line 15I chickens (Figure 4C).  
221 A previous genome-wide association study using an F2 intercross between lines C.B12 and 15I  
222 revealed a 35 MB region of chromosome 2 is significantly associated with resistance to coccidiosis  
223 (31, 32). We identified genes in this region that were differentially regulated at one or more time  
224 points (Table S6). Forty-seven genes in this region were differentially regulated in at least one  
225 condition. Out of 47, 10 genes were differentially expressed between two lines, including ATP  
226 binding cassette subfamily A member 13 (*ABCA13H*), Dermatan sulphate epimerase like (*DSEL*),  
227 Serpin family B member 2 (*SERPINB2*) and Sad1 and UNC84 domain containing 3 (*SUN3*). The F-  
228 box protein 15 (*FBXO15*), which is involved in the MHC class I processing pathway, was  
229 downregulated earlier in the line C.B12 compared to line 15I chickens during *E. maxima* infection.  
230 The interferon alpha inducible protein 6 (*IFI6*), which plays a role in cell apoptosis, was upregulated  
231 in line C.B12 at 6 dpi but not in line 15I chickens, compared to non-infected chickens.

232

233 *Differential kinetics of IFN- $\gamma$  and IL-10 expression in the jejunum of relatively resistant and*  
234 *susceptible chickens following E. maxima infection*

235 During the analysis of RNA-Seq results, we noticed that *IFNG* and *IL10* expression increased more  
236 rapidly post-infection in line C.B12 (4 dpi) compared to line 15I (6 dpi) (Figure 5A). Expression of  
237 *IFNG* was significantly increased (FDR < 0.05) at 6 and 8 dpi in line 15I, but in line C.B12 at 4, 6 and  
238 8 dpi, while *IL10* was significantly upregulated at 6 and 8 dpi in line 15I and at 6 dpi in line C.B12.  
239 Although *IL10* was not significantly upregulated at 4 dpi in line C.B12, this is likely due to the high  
240 variance between birds at this time point, with some samples showing elevated *IL10* counts.

241 To verify the transcriptomic results and to obtain insight into the role of IFN- $\gamma$  and IL-10 in  
242 susceptibility to *E. maxima* infection, *IFNG* and *IL10* mRNA levels in lines C.B12 and 15I were  
243 determined in the jejunum at 2, 4, 5, 6, 7, 8 and 13 dpi (Figure 5B). Across control birds of all time  
244 points, line C.B12 birds had significantly higher ( $p < 0.01$ ) *IFNG* mRNA transcription in the jejunum

245 compared to line 15I. In both chicken lines, the greatest increase in *IFNG* mRNA transcription,  
246 relative to control birds of the same line, was at 6 dpi (Figure 5B). At 6 and 8 dpi, line 15I exhibited  
247 significantly greater increases in *IFNG* mRNA levels compared to line C.B12 chickens. Analysis of  
248 IFN- $\gamma$  protein in the jejunum by ELISA revealed biphasic increases in IFN- $\gamma$  production at 5 and 7 dpi  
249 in both chicken lines (Figure 5C). During *E. maxima* infection, line C.B12 exhibited significantly  
250 increased IFN- $\gamma$  protein in the jejunum at 2, 4, 5, 7 and 8 dpi, whereas line 15I had significantly  
251 increased IFN- $\gamma$  protein at 5 and 7 dpi compared to their non-infected counterparts. Following  
252 infection, line 15I birds exhibited higher levels of IFN- $\gamma$  protein in the jejunum at 6 and 8 dpi  
253 compared to line C.B12.

254 At 4 dpi, line C.B12 transcribed higher levels of *IL10* mRNA in the jejunum relative to age-matched  
255 control birds of the same line and control or infected line 15I birds (Figure 5B). However, the  
256 transcription of *IL10* mRNA in the jejunum of line 15I was dramatically increased, relative to controls,  
257 at 6 dpi, whereas line C.B12 expressed similar increases in *IL10* mRNA levels at 2, 4, 6 and 13 dpi.  
258 There was no significant difference in the basal transcription of *IL10* between control birds of the two  
259 lines across all time points. Similarly to IFN- $\gamma$  protein levels in the jejunum, there were two peaks of  
260 IL-10 protein levels in the jejunum at 5 and 7 dpi (Figure 5C). The levels of IL-10 protein in the  
261 jejunum of the control birds was either lower than the limit of detection (as in line 15I) or very little  
262 was present (as in line C.B12) across all time points. At 5 dpi, there were significantly increased IL-  
263 10 protein levels in the jejunum of both lines of chicken. The increased IL-10 protein induced by *E.*  
264 *maxima* infection then slightly decreased at 6 dpi, but increased again at 7 dpi. Unlike mRNA levels,  
265 there was no significant difference in IL-10 protein levels between the two lines at any of the time  
266 points.

267 We also measured mRNA levels of Th17-associated genes *IL17A*, *IL17F*, *IL21*, *IL2* and *IL6* (Figure 6  
268 and Figure S1). Although the expression of *IL2* mRNA levels at 2 and 6 dpi seemed to be  
269 upregulated, the change was not significant due to the high variance between chickens (Figure S1).  
270 Among the measured genes, only *IL21* showed a significant increase in the jejunum of both lines of

271 chickens during *E. maxima* infection (at 4 and 6 dpi) compared to their non-infected counterparts  
272 (Figure 6). Additionally, at 4 and 6 dpi, line 15I transcribed significantly higher *IL21* mRNA levels  
273 compared to line C.B12 chickens whereas at 13 dpi, *IL21* mRNA was higher in line C.B12 birds.  
274 However, the protein levels of IL-21 in jejunum and serum were either very low or below the  
275 detection limit of the ELISA.

276

277 *Differential kinetics of IFN- $\gamma$  and IL-10 levels in the serum of relatively resistant and susceptible*  
278 *chickens following E. maxima infection*

279 Unlike the levels of IFN- $\gamma$  protein in the jejunum, the kinetics of serum IFN- $\gamma$  differed between the  
280 lines with C.B12 peaking at 4 and 6 dpi and line 15I at 7 dpi (Figure 5D). *E. maxima*-infected line  
281 C.B12 exhibited significantly higher levels of serum IFN- $\gamma$  at 4, 6 and 13 dpi compared to non-  
282 infected chickens. In line 15I, significantly higher serum IFN- $\gamma$  was observed at 6 and 7 dpi  
283 compared to non-infected chickens. Compared to infected line C.B12, infected line 15I chickens had  
284 significantly higher serum IFN- $\gamma$  at 7 dpi.

285 Serum IL-10 levels were significantly increased in line C.B12 following *E. maxima* infection at 4, 5, 6  
286 and 7 dpi, while in line 15I, significantly increased serum IL-10 was observed from 4 to 13 dpi during  
287 *E. maxima* infection (Figure 5D). At 4 dpi, line C.B12 had higher levels of serum IL-10 compared to  
288 line 15I following *E. maxima* infection. However, serum IL-10 levels in the *E. maxima*-infected line  
289 15I were significantly higher than that of C.B12 chickens at 6, 7 and 8 dpi. The levels of serum IL-10  
290 in line 15I were dramatically increased at 7 dpi during *E. maxima* infection, whereas in line C.B12  
291 chickens, serum IL-10 levels remained similar to those observed at 5 and 6 dpi.

292

293 *Correlation between local and systemic IFN- $\gamma$  and IL-10 production and parasite burden*

294 To investigate the effect of IFN- $\gamma$  and IL-10 on *E. maxima* burden, the correlation between jejunum  
295 and serum IFN- $\gamma$  and IL-10 protein levels and *E. maxima* replication were calculated (Table 2). Both

296 local (jejunum) and systemic (serum) IFN- $\gamma$  and IL-10 levels in both lines of chickens correlated  
297 positively with *E. maxima* burden. Serum IFN- $\gamma$  in line 15I correlated more strongly with *E. maxima*  
298 burden than in line C.B12 chickens, whereas tissue IFN- $\gamma$  correlated more strongly with *E. maxima*  
299 burden in line C.B12 compared to line 15I chickens. Both serum and jejunum IL-10 in line 15I  
300 correlated more strongly with *E. maxima* burden compared to line C.B12 chickens. We also  
301 measured the effect of IFN- $\gamma$  and IL-10 on BWG. Although the expression of IFN- $\gamma$  and IL-10 in the  
302 jejunum and serum correlated negatively with BWG, the correlation was not significant ( $p > 0.05$ )  
303 (data not shown).

304

### 305 *Cellular changes following E. maxima infection*

306 To investigate and compare changes to the immune cell populations in the two lines of chickens at the  
307 early stages of *E. maxima* infection, IHC was performed with jejunum collected at 4 dpi (Figure 7).  
308 We first compared jejunum of uninfected birds to establish if intrinsic differences between the lines  
309 existed. There was no significant difference in the number of cells expressing any of the measured  
310 cell markers in the villus lamina propria (Figure 7A) or epithelium (Figure 7B) between the two lines,  
311 although line C.B12 displayed slightly higher numbers of CD4<sup>+</sup>, CD8 $\alpha$ <sup>+</sup>,  $\gamma\delta$  T<sup>+</sup> and  $\alpha\beta$ 1<sup>+</sup> T cells.

312 At 4 dpi, there was no difference in the population of the measured cell markers between *E. maxima*-  
313 infected and non-infected chickens in the jejunum lamina propria or epithelium of either chicken line.  
314 However, comparison of the number of cells in *E. maxima*-infected tissues revealed significantly  
315 lower numbers of CD4<sup>+</sup>, CD8 $\alpha$ <sup>+</sup> and MRC1L-B<sup>+</sup> cells in the lamina propria (Figure 7A) and  $\alpha\beta$ 1<sup>+</sup> T  
316 cells in the epithelium of the villi (Figure 7B) in line 15I compared to line C.B12 chickens.

317 We also measured changes to the immune cell populations in the lamina propria and epithelium of the  
318 crypts in both lines of chickens (Figure S2). There was no significant difference in the number of  
319 cells between uninfected chickens of line C.B12 and line 15I, or between *E. maxima*-infected and  
320 non-infected chickens within each lines. Comparison of the number of cells in the crypts of *E.*

321 *maxima*-infected chickens revealed significantly lower numbers of  $\alpha\beta1^+$  T cells and higher numbers of  
322 chB6+ cells in the epithelium of line 15I compared to line C.B12 chickens (Figure S2B).

323

## 324 **Discussion**

325 Understanding the basis of resistance to *E. maxima* is important for the commercial poultry industry  
326 as it would enable identification of quantifiable resistance or susceptible phenotypes, allowing for the  
327 selective breeding of chickens for resistance against this and possibly other *Eimeria* species. Thus,  
328 investigation of host responses to *Eimeria* infection in the relatively resistant and susceptible White  
329 Leghorn chicken lines C.B12 and 15I has important economic implications for the poultry production  
330 industry, in addition to avian well-being and food security. In this study, we characterised the kinetics  
331 of differential gene expression in these two lines of chicken, as well as the kinetics of local and  
332 systemic protein expression and mRNA transcription of IFN- $\gamma$ , IL-10, IL-21 and Th17 responses. We  
333 have also investigated cellular differences between control and infected birds of both lines during the  
334 early stages of infection. The results indicate the importance of early activation of interferon  
335 signalling pathways, with IFN- $\gamma$ , IL-10 and IL-21 responses during the innate phase of infection  
336 associated with resistance to *E. maxima*. This research builds on previous work, investigating the  
337 importance of these responses from transcriptome to protein levels in the jejunum, the site of *E.*  
338 *maxima* infection, and systemically at the protein level in the serum.

339 Transcriptomic analysis of jejunal tissue from chicken lines C.B12 and 15I infected with *E. maxima*  
340 revealed differences in the kinetics of the host immune response and provided information on the  
341 different biological pathways involved. Commonalities between the two lines included strong  
342 upregulation of *IFNG*, various chemokines and complement components at 6 dpi, which agrees with  
343 previous transcriptome based analysis of chicken caecal epithelial responses to *E. tenella* (33).  
344 Although there was no difference in *E. maxima* replication at 4 dpi between the two lines, early  
345 immune responses observed in relatively resistant line C.B12 at this time point, in particular  
346 interferon responses, may be sufficient to reduce *E. maxima* replication at 7 dpi compared to line 15I

347 where these responses did not occur until 6 dpi, potentially leading to a delay in the inhibition of *E.*  
348 *maxima* replication. Pathways involved in Th1 and Th2 responses were also upregulated at 4 dpi in  
349 line C.B12. Although 4 dpi is likely too early for such adaptive responses, higher numbers of CD4,  
350 CD8 $\alpha$  and  $\alpha\beta$ 1 T cells were present in the jejunum of control and infected line C.B12 compared to  
351 line 15I birds, and are cell types associated with these responses. Regardless of resistance and  
352 susceptibility to *E. maxima*, both chicken lines share many of the same upstream regulators including  
353 IFN- $\gamma$ , IL-10RA and IL-2 that may cause changes in gene expression; however, similar to functional  
354 pathway analysis, all the predicted upstream regulators affect expression in line C.B12 at 4 dpi and 6  
355 dpi, whereas line 15I chickens are not affected by the same upstream regulators until 6 dpi, supporting  
356 the importance of the early immune responses in resistance to *E. maxima* infection. Transcriptomic  
357 analysis also revealed a set of interferon-stimulated genes that were uniquely responding in line  
358 C.B12, including *MX1*, *RSAD2* and *OASL*, that may be involved in the relative resistance displayed by  
359 line C.B12.

360 One of the important findings of this study was that higher increases in early (2 and 4 dpi) IFN- $\gamma$  and  
361 IL-10 production correlated with resistance to *E. maxima*, whereas a more gradual increase (a minor  
362 increase at 2 and 4 dpi but a dramatic increase at 6 and 8 dpi) in production of these cytokines was  
363 correlated with susceptibility, indicating the timing at which the immune response is mounted is  
364 paramount to resistance. These results were evaluated by IHC, showing that an intrinsically higher  
365 presence of IFN- $\gamma$ -producing (CD4<sup>+</sup>,  $\alpha\beta$ 1<sup>+</sup> T cells and MRC1L-B<sup>+</sup> macrophages (34)) LPL and IEL  
366 were present in relatively resistant line C.B12 in the villi of control birds than in line 15I at 4 dpi.  
367 Moreover, significantly higher numbers of MRC1L-B<sup>+</sup> macrophages, CD4<sup>+</sup> and CD8 $\alpha$ <sup>+</sup> cells were  
368 detected in the lamina propria of infected line C.B12 compared to line 15I birds, indicating  
369 macrophage and NK cell involvement at 4 dpi. Chicken intestinal IEL include NK cells which may  
370 express CD8 $\alpha$  (35), chB6 (36) or TCR $\gamma\delta$  (37). Likewise, Wakelin et al. (39) showed Con A-  
371 responsive cells in the mesenteric lymph nodes appeared earlier and produced more IFN- $\gamma$  in *E.*  
372 *vermiformis*-resistant mice following infection. Taken together, significantly up-regulated IFN- $\gamma$   
373 expression in the jejunum of *E. maxima*-infected chickens is likely due to the recruitment and



374 stimulation of MCR1L-B<sup>+</sup>, CD4<sup>+</sup> and CD8α<sup>+</sup> cells. Hong et al., (19) showed that *IL10* and *IFNG*  
375 mRNA transcription was robustly increased at 4 and 6 dpi in CD4 and CD8 cell subpopulations  
376 following *E. maxima* infection. The current study identified higher numbers of CD4 and CD8α IEL  
377 and LPL in line C.B12, both prior to and following infection. In support of these findings, higher  
378 numbers of CD4<sup>+</sup> IEL were detected in the duodenum during early *E. acervulina* infection in resistant  
379 chickens (40) and increased CD4<sup>+</sup> LPL were detected within 24 h of intra-caecal inoculation of *E.*  
380 *tenella* sporozoites (41), implying CD4<sup>+</sup> cells are effectors of *Eimeria* resistance early on during  
381 infection and could be a source of the early IL-10 and IFN-γ observed in this study.

382 IL-10 is a pleiotropic cytokine and in addition to maintaining the Th1/Th2 balance, it is also important  
383 to normal gut homeostasis, regulating NK cell and macrophage activity, limiting proinflammatory  
384 cytokine production and promoting epithelial cell proliferation amongst other functions (42). The  
385 impact of IL-10 on the outcome of *Eimeria* infection is likely dependent on both the timing and  
386 magnitude of its production. Early IL-10 may be involved in mediating innate responses; pegylated  
387 recombinant human IL-10 induces IFN-γ, perforin and granzyme B secretion in CD8<sup>+</sup> T cells (43).  
388 Other publications have indicated that IL-10 reduces the efficacy of the immune response to *Eimeria*.  
389 Antibody-mediated IL-10 depletion in broilers enhanced weight gain and decreased oocyst production  
390 following inoculation with an attenuated *Eimeria* spp. vaccine (*E. maxima*, *E. tenella* and *E.*  
391 *acervulina*) (30) and did not appear to affect adaptive immunity as IL-10-depleted-chickens displayed  
392 similar weight gains following vaccination then challenge as control birds (44). Additionally, in  
393 broilers treated with CitriStim, a yeast mannan-based feed additive, and given an attenuated vaccine  
394 (*E. maxima*, *E. tenella* and *E. acervulina*), reduced *IL10* mRNA was found in the caecal tonsils which  
395 was accompanied by reduced oocyst shedding and improved feed efficiency and weight gains (45).  
396 Although in the study by Rothwell et al. (27), *IL10* transcripts were detected in the spleen of control  
397 birds, we did not detect IL-10 at a protein level in the serum in our study. Rothwell et al. (27) also  
398 observed extremely low basal levels of *IL10* mRNA in the jejunum of uninfected chickens whereas  
399 the current results suggest that *IL10* mRNA is transcribed in the jejunum under normal homeostatic  
400 conditions. This discrepancy is attributable to the increased sensitivity of the primer and probe



401 sequences used in this study (data not shown). Levels of IL-10 protein positively correlated with *E.*  
402 *maxima* replication and it is plausible *E. maxima* is inducing IL-10 as an immune evasion strategy.  
403 Similar to the findings by Hong et al. (19), each vaccination with *E. maxima* led to increased serum  
404 IL-10, however the extent to which increases were observed gradually decreased with each  
405 subsequent vaccination, whereas serum IFN- $\gamma$  was only increased after the first vaccination (in our  
406 unpublished data). The current study suggests that an early, modest induction of IL-10 does not  
407 negatively impact resistance to *E. maxima* infection, but excessive IL-10 production disrupts the  
408 efficacy of the protective response. These findings imply that IL-10 can be suitable as a biomarker of  
409 susceptibility at late time points with *E. maxima* infection, but less suitable as a predictor of  
410 susceptibility prior to or early on during infection.

411 IL-17A and IL-17F are mainly considered cytokines of the Th17 cell lineage, which functions in  
412 autoimmune disease and defence against bacterial, fungal and parasitic pathogens (46, 47, 48). More  
413 recently IL-17A and IL-17F have been related to innate cells including NK and  $\gamma\delta$  T cells and  
414 macrophages. They are important mediators of mucosal immunity and innate responses, with  
415 functions including neutrophil recruitment, macrophage activation and IFN- $\gamma$  production and  
416 chemokine and antimicrobial peptide production in epithelial cells (49, 50). As our study implies,  
417 early innate responses are key to resistance to *E. maxima* and previous studies have indicated that  
418 *Eimeria* spp. infection in chickens leads to the increased transcription of *IL17A*, as well as *IL2* and *IL6*  
419 mRNAs (19, 51). In contrast, our RT-qPCR and RNA-Seq data revealed there was no significant  
420 change in *IL17A*, *IL17F*, *IL2* and *IL6* mRNA levels during *E. maxima* infection. Although *IL17A* and  
421 *IL2* mRNA levels at 2 and 6 dpi seemed to be upregulated, the change was not significant due to the  
422 high variance between chickens within the same group. Previously it has been suggested that IL-17A  
423 impairs immunity to *Eimeria* spp. infection. Zhang et al. (52) showed increased *IL17A* mRNA  
424 transcription at 6 hours post infection with *E. tenella*. IL-17A depletion reduced heterophil  
425 infiltration and associated immunopathology in the caeca, but also reduced oocyst output indicating  
426 that IL-17A is involved in susceptibility to *E. tenella*. In addition, Del Cacho et al. (53) also found  
427 that IL-17A reduced *E. tenella* schizont development and migration. Among the Th17-associated

428 genes tested, only *IL21* mRNA levels were increased in the jejunum of both lines of chickens during  
429 *E. maxima* infection compared to non-infected chickens. A member of the IL-2 family, IL-21 plays  
430 important roles not only in Th17 differentiation, but also in innate immunity, with functions including  
431 enhancement of cytotoxicity and IFN- $\gamma$  production in NK and CD8 T cells (54, 55). Additionally, IL-21  
432 plays key roles in autoimmune disease and in shaping humoral and cellular immune responses to  
433 parasitic infection (56, 57). In chickens, increased *IL21* mRNA levels are reported in autoimmune  
434 vitiligo. To date, IL-21 has not been previously found to have a role during *Eimeria* infection. The  
435 kinetics of our study revealed that the pattern of *IL21* mRNA transcription was similar to *IFNG* and  
436 *IL10* in the jejunum, indicating that IL-21 may also be involved in resistance to *E. maxima* through  
437 mediating innate immunity. Similar transcription patterns of *IFNG*, *IL10* and *IL21* mRNA were  
438 reported during the development of vitiligo lesions (58). Moreover, in mice IL-21 modulates  
439 differentiation of CD4 and CD8 T cell subsets in a context-dependent manner and certain cytokines,  
440 including IL-10, may compensate for IL-21 (59). Since *E. maxima* infection leads to an increase in  
441 CD8 $\alpha$  T cell numbers, it is possible that the co-expression of IL-21, IFN- $\gamma$  and IL-10 may play an  
442 important role in the enhancement of CD8 T cell responses, as reflected in the higher numbers of  
443 CD8 $\alpha$  IEL and LPL in the jejunum of line C.B12 birds observed in this study. Previously, cytotoxic  
444 CD8 cell activity was shown to be a component of protective immunity to secondary *E. tenella*  
445 infection (41, 60, 61) and resistance and IFN- $\gamma$  production during primary *E. acervulina* infection in  
446 chickens (62). The early timing of this response in line C.B12, alongside the fact that no other Th17-  
447 associated genes tested were changed during infection, indicates that Th17 responses are not involved  
448 during *Eimeria* spp. infection.

449 The present study suggests that the timing of the immune response is crucial for *E. maxima* resistance.  
450 Immunity to *Eimeria* arises during sporozoite translocation through the lamina propria in chickens (60,  
451 63, 64). Therefore logically, resistance to *Eimeria* spp. relies on the host response in the first few  
452 days of infection, when the majority of sporozoites are present in the lamina propria and in contact  
453 with LPL. The increased IL-10 observed in line 15I in the serum suggests that systemic IL-10  
454 production promotes susceptibility to *E. maxima*, but given the positive correlation of IL-10, IFN- $\gamma$

455 and IL-21 with one another and the higher expression in resistant chickens at early time points implies  
456 that the balance between the three is imperative for effective immunity to *E. maxima*.

457

## 458 **Methods**

### 459 *Ethics statement*

460 Animal work was carried out in strict accordance with the Animals (Scientific Procedures) Act 1986,  
461 an Act of Parliament of the United Kingdom, following approval by the Royal Veterinary College  
462 Ethical Review Committee and the United Kingdom Government Home Office.

463

### 464 *Animals and parasites*

465 Chickens of two inbred White Leghorn lines were used in this study. Inbred line 15I, relatively  
466 susceptible to *E. maxima* infection, originate from the Regional Poultry Research Laboratory (East  
467 Lansing, MI). Reaseheath C (line C, C.B12) chickens, relatively resistant to *E. maxima* infection,  
468 originate from the University of Cambridge (Cambridge, UK). Both flocks were maintained at the  
469 National Avian Research Facility (NARF; The Roslin Institute, UK).

470 The Weybridge (W) strain of *E. maxima* was used (65). Parasites were passaged at frequent intervals  
471 through dosing and faecal recovery as described previously (66), and used less than one month after  
472 sporulation.

473

### 474 *Experimental design, sampling and data collection*

475 Line C.B12 and 15I chickens were supplied at day-of-hatch without prior vaccination to the Royal  
476 Veterinary College, where chickens were reared in coccidia-free, environmentally enriched conditions  
477 with feed and water provided *ad libitum*. Chickens were housed following Defra stocking density  
478 guidelines and raised under industry-standard conditions. Prior to inoculation, chickens ( $n = 60$  and  $n$

479 = 62 for lines C.B12 and 15I, respectively) were randomly allocated to four different pens  
480 corresponding to the two lines and two different experimental treatments: control and infected. The  
481 absence of prior coccidian infection was confirmed by faecal flotation. Three-week-old chickens  
482 were orally infected with 100 sporulated *E. maxima* oocysts (test) or sterile water (control).

483 In order to analyse differential kinetic immune responses elicited by *E. maxima* infection, blood and  
484 small intestine (jejunum) were collected from 3 chickens in the control groups and a minimum of 5  
485 chickens in the infected groups at 2, 4, 5, 6, 7, 8 and 13 dpi. Body weight was recorded individually  
486 two days prior to infection and prior to culling at each sampling point and the percentage weight gain  
487 calculated. Chickens were culled by cervical dislocation following the Schedule 1 method, and death  
488 confirmed by permanent cessation of circulation. Blood was collected from the jugular vein  
489 immediately after culling. For serum, blood samples were allowed to clot at room temperature,  
490 followed by centrifugation at 1,500 x g for 3 min and the separated serum stored at -20°C.

491 Approximately 10 cm of small intestine, spanning 5 cm anterior and posterior to Meckel's  
492 diverticulum (the mid-point of the intestinal area infected by *E. maxima*) was excised (66), and  
493 parasite-related lesions scored as described by Johnson and Reid (67). Approximately 0.5 cm of  
494 jejunum, 1 cm anterior to the Meckel's diverticulum, was collected into RNAlater® Stabilization  
495 solution (Life Technologies, CA, USA) for gene expression analysis and by snap-freezing in liquid  
496 nitrogen for analysis of tissue protein levels. For histology, 1 cm of jejunum tissue was snap frozen in  
497 optimum cutting temperature (OCT) compound on liquid nitrogen and stored at -80°C until use. For  
498 parasite quantification, the remaining excised tissues were stored in RNAlater® Stabilization solution  
499 at 4°C overnight then at -20°C after removal of the reagent.

500

#### 501 *Isolation of genomic DNA and quantitative PCR (qPCR) for E. maxima replication*

502 Total genomic DNA (gDNA) was isolated from the excised small intestine as described previously  
503 (68). Briefly, tissue samples were weighed and suspended in an equal volume (w/v) of tissue lysis  
504 buffer (Buffer ATL, Qiagen, Crawley, UK), and homogenized employing a TissueRuptor (Qiagen).

505 Subsequently, the equivalent of  $\leq 25$  mg of the homogenate was used to carry out the gDNA isolation  
506 using a DNeasy® Blood and Tissue kit (Qiagen) according to the manufacturer's instructions. The  
507 gDNA was stored at  $-20^{\circ}\text{C}$ , until further investigation.

508 Quantitative PCR (qPCR) was performed as previously described (68) using a CFX96 Touch® Real-  
509 Time PCR Detection System (Bio-Rad Laboratories, CA, USA). For the quantification of *E. maxima*  
510 total genome copy numbers, we used the primers EmMIC1\_For (forward: 5'-TCG TTG CAT TCG  
511 ACA GAT TC-3') and EmMIC1\_Rev (reverse: 5'-TAG CGA CTG CTC AAG GGT TT-3') (10). The  
512 chicken cytoplasmic  $\beta$ -actin (actb) gene was used for data normalization, amplified using the primers  
513 actb\_FW (forward: 5'-GAG AAA TTG TGC GTG ACA TCA-3') and actb\_RV (reverse: 5'-CCT  
514 GAA CCT CTC ATT GCC A-3') (69). Briefly, each sample was amplified in triplicate in a 20  $\mu\text{L}$   
515 volume containing 1  $\mu\text{L}$  of total gDNA, 300 nM of each primer, 10  $\mu\text{L}$  of SsoFast™ EvaGreen®  
516 Supermix (Bio-Rad Laboratories), and 8.8  $\mu\text{L}$  of nuclease-free water (Life Technologies) with qPCR  
517 cycling conditions that consisted of  $95^{\circ}\text{C}$  for 2 min as initial denaturation, followed by 40 cycles of  
518 denaturation at  $95^{\circ}\text{C}$  for 15 sec and annealing/extension at  $60^{\circ}\text{C}$  for 30 sec. Dissociation curves were  
519 generated to analyse individual PCR products after 40 cycles. Each qPCR assay included the relevant  
520 gDNA dilution series as standards (68) and no template controls. The genome copy numbers from the  
521 chicken (actb) and the *E. maxima* parasites (EmMIC1) were estimated by comparison with the gDNA  
522 dilution series. Triplicate data arising from each test sample were averaged and standardized by  
523 comparison with the concentration of chicken genome as a ratio of *E. maxima* genomes/chicken  
524 genomes.

525

#### 526 *Total RNA preparation and quantitative real-time PCR (RT-qPCR)*

527 Total RNA was extracted from the jejunum using the RNeasy® Mini Spin Column Kit (Qiagen)  
528 following the manufacturer's instruction. Briefly, approximately 25 mg of tissues were homogenized  
529 in 2 mL tubes containing 600  $\mu\text{L}$  of Buffer RLT with 2%  $\beta$ -mercaptoethanol and a stainless steel bead

530 (5 mm, Qiagen) using a TissueLyser II system (Qiagen). The supernatant was collected and applied  
531 to a QIAshredder column (Qiagen) to improve the quality of total RNA. The flow-through was mixed  
532 with an equal volume of 70% ethanol and applied to an RNeasy® Spin column (Qiagen).  
533 Contaminating gDNA was digested by on-column DNase treatment using RNase-free DNase (Qiagen)  
534 and total RNA was eluted with 80 µL of nuclease-free water (Qiagen). The absorbance at 230, 260  
535 and 280 nm was measured using a NanoDrop 1000 spectrophotometer (Thermo Scientific). For the  
536 transcriptomic study, the quantity and quality of total RNA was assessed using a Qubit® RNA BR  
537 assay kit (Life Technologies) by Qubit® 3.0 fluorometer (Life Technologies) and an RNA  
538 ScreenTape (Agilent Technologies, USA) by 2200 TapeStation System (Agilent Technologies),  
539 respectively.

540 The mRNA levels of target cytokines were quantified by TaqMan® real-time quantitative PCR (RT-  
541 qPCR) as described previously (70) (Table 3). TaqMan assays were performed using the One-Step  
542 RT-PCR Master Mix reagent, and amplification and detection were performed using the TaqMan Fast  
543 Universal PCR Master mix in the AB 7500 FAST Real-Time PCR System (Applied Biosystems).  
544 Standard curves for each target gene were generated as previously described (71). Each RT-qPCR  
545 assay contained triplicate no-template controls, test samples and a log<sub>10</sub> dilution series of standard  
546 RNA. Relative gene expression of the infected birds to control birds was calculated using the Pfaffl  
547 method as described by Sutton et al. (70) and the results were presented as log<sub>10</sub> fold-change of target  
548 gene in each line at each time point.

549

#### 550 *RNA-Seq library construction, sequencing and data analysis*

551 The total RNA of 64 samples were submitted to Edinburgh Genomics, where libraries from each of  
552 the 64 individuals were generated using automated TruSeq stranded mRNA-Seq library, and the  
553 individual jejunum transcriptomes were sequenced by 150 cycles generating paired-end reads using  
554 Illumina HiSeq 4000 technology to yield at least 290M reads. The 64 samples included 3 control and  
555 5 *E. maxima* infected samples from lines C.B12 and 15I at 2, 4, 6 and 8 dpi.

556 Reads were trimmed using Trimmomatic (ver. 0.36) (72) to remove adaptor sequences of the TruSeq  
557 Stranded mRNA kit and for quality. After trimming, reads were required to have a minimum length  
558 of 75 bases. The RNA-seq reads were mapped to the reference genomes using the STAR aligner  
559 software package (ver. 2.5.1b) (73). The reference genome used for mapping was the *Gallus gallus*  
560 (*Gallus\_gallus-5.0*) and *Eimeria maxima* (EMW001) genomes from Ensembl  
561 (<https://www.ensembl.org/index.html>). The annotation used for counting was derived from the *Gallus*  
562 *gallus* genome only, such that reads mapping to *E. maxima* were not counted in downstream analysis.  
563 Raw counts for each annotated gene were obtained using the featureCounts software (ver. 1.5.2) (74).  
564 Differential gene expression analysis was performed using the Bioconductor edgeR package (ver.  
565 3.16.5) (75). Statistical assessment of differential expression was carried out with the likelihood-ratio  
566 test. Differentially expressed genes were defined as those with FDR <0.05 and logFC > 1.6.  
567 Heatmaps were constructed in R using the pheatmap package. Overrepresentation of GO terms was  
568 investigated using the PANTHER Overrepresentation Test (released December 5, 2017) using Fisher's  
569 Exact with FDR multiple test correction. Network analysis for both sample-sample and gene-gene  
570 networks was performed using BioLayout 3D (76) which performs a Pearson correlation matrix  
571 calculated for each pair of samples or genes, using a modified Fruchterman-Rheingold algorithm, with  
572 correlation cut offs of  $r = 0.93$  (sample-sample) and  $r = 0.87$  (gene-gene). Clustering was performed  
573 on these networks using the Markov clustering algorithm (MCL) with an inflation value of 2.4  
574 (sample-sample) and 1.4 (gene-gene). The IPA program (Ingenuity® System) was used to identify  
575 cellular canonical pathways and physiological functions that are affected by *E. maxima* infection in  
576 the host ( $p$ -value < 0.05 and  $q$ -value < 0.05).

577

#### 578 *Preparation of protein lysates from tissue samples and capture ELISA assays*

579 To determine protein levels of cytokines in tissues, protein lysates were prepared from the collected  
580 jejunum using the modified protein lysis buffer (20 mM Tris (pH 7.5), 100 mM NaCl, 0.5% NP-40  
581 (IGEPAL® CA-630, Sigma), 0.5 M EDTA, 0.5 mM phenylmethylsulfonyl fluoride (Sigma) and 0.5%



582 protease inhibitor cocktail (Sigma)). Approximately 20 mg of jejunum were mixed with 600  $\mu$ L of  
583 the prepared protein lysis buffer and homogenized using 5 mm stainless steel beads (Qiagen) and a  
584 TissueLyser II system (Qiagen), twice at 25 Hz for 2 min with a 5 min incubation on ice between the  
585 two homogenizations. The samples were centrifuged at 13,000  $\times g$  for 10 min at 4°C and the  
586 supernatants transferred to chilled microcentrifuge tubes. The concentrations of the protein lysates  
587 were measured using the BCA Protein Assay kit (Thermo Scientific) according to the manufacturer's  
588 instructions.

589 IL-10 and IFN- $\gamma$  protein levels in serum and tissues were measured by ELISA. IL-10 was quantified  
590 using an in house-developed ELISA system (kindly provided by Dr. Z. Wu) for serum as described  
591 previously (29) and was adapted for use with tissue lysates. Briefly, assay plates (Nunc Immuno  
592 MaxiSorp, Thermo Scientific) were coated with 3  $\mu$ g/mL of capture antibody diluted in  
593 carbonate/bicarbonate buffer at 4°C overnight. Plates were incubated with 50  $\mu$ L of 2-fold serially  
594 diluted standards, sera or protein lysates for 1 hr, followed by incubation with 1  $\mu$ g/mL of detection  
595 antibody for 1 hr. The plates were incubated with the Pierce High Sensitivity streptavidin-HRP  
596 (1:10,000 dilution, Thermo Scientific) for a further hour before adding 50  $\mu$ L of 1-Step Turbo TMB  
597 (Thermo Scientific). After 10 min, the reaction was stopped by adding 50  $\mu$ L of 2 N sulphuric acid.  
598 The absorbance was read at 450 nm (650 nm as a reference). Serum and tissue IFN- $\gamma$  levels were  
599 quantified using the Chicken IFN- $\gamma$  CytoSet kit (Life Technologies) as per the manufacturer's  
600 instructions.

601 The standard curve was fitted to a four-parameter logistic regression curve and final concentration  
602 measures were determined using the online program provided by [elisaanalysis.com](http://www.elisaanalysis.com)  
603 (<http://www.elisaanalysis.com/>). The quantity of IL-10 and IFN- $\gamma$  protein in the jejunum was  
604 converted from the concentration determined by ELISA to the quantity of protein in 1 mg of tissue by  
605 correcting for the amount of protein lysate used in the ELISA and the total protein lysate in 1 mg of  
606 tissue.

607



608 *Immunohistochemistry (IHC)*

609 Immunohistochemistry was performed to determine differences in cell populations in the jejunum of  
610 line C.B12 and 15I chickens at 4 dpi with *E. maxima*. Cryostat sections (7 µm thick) were picked  
611 onto Superfrost® glass slides (Thermo Scientific) and air-dried. Sections were fixed in acetone with  
612 0.75% H<sub>2</sub>O<sub>2</sub> for 10 min at room temperature and air-dried for a further 5 min. The sections were  
613 incubated with monoclonal antibodies (purchased from Southern Biotech, Cambridge, UK, Table 2)  
614 specific for various leukocyte subpopulations. The Vectastain Elite ABC (Mouse IgG) Kit (Vector  
615 Laboratories, CA, USA) was used to detect monoclonal antibodies and peroxidase activity developed  
616 using the AEC staining kit (Sigma) following the manufacturer's instructions. Subsequently, sections  
617 were counterstained with haematoxylin Z (CellPath, Newtown, UK), and bluing performed with  
618 Scott's Tap Water (tap water, 2 % magnesium sulphate, 0.35% sodium bicarbonate). Slides were  
619 mounted in Aquamount AQ (Vector Laboratories) and images were captured with an Eclipse Ni  
620 microscope (Nikon, Tokyo, Japan), followed by quantification of the subpopulation of T lymphocytes  
621 using ZEN lite 2012 software (blue edition, Carl Zeiss). To enumerate cell sub-populations in the  
622 jejunum, the number of lamina propria lymphocytes (LPL) and IEL were counted per 300 µm length  
623 of villi and per 150 x 150 µm<sup>2</sup> area of crypts. Cells were counted from 3 different areas per section  
624 and 3 villi or crypt regions were selected per area.

625

626 *Statistical analysis*

627 All statistical analysis was conducted with Minitab 17 software (Minitab Inc., USA). Data were  
628 analysed for normality using the Anderson-Darling test and significance assessed by the Mann-  
629 Whitney U test. The Spearman's rank correlation coefficient was calculated to evaluate relationships  
630 between parasitaemia and host immune responses, and each cytokine in the serum and jejunum.

631

632 **Acknowledgments**

633 We are thankful to the staff at the Bumstead Unit at the National Avian Research Facility (NARF) for  
634 the supply of the chickens used in this study and to the staff at the Biological Services Unit at the  
635 RVC for their assistance in the care of the animals. We are also grateful to Edinburgh Genomics for  
636 their assistance with the transcriptome analysis. Also with thanks to Professor John Hopkins and Dr  
637 Mitch Abrahamson for their advice throughout this research.

638

## 639 **Funding**

640 This research was supported by the Biotechnology and Biological Sciences Research Council  
641 (BBSRC) grants BB/L502455/1 and BB/L004046/1, in partnership with Cobb-Vantress Inc. This  
642 work was also supported by the Biotechnology and Biological Sciences Research Council Institute  
643 Strategic Program Grant BBS/E/D/20231760 and BBS/E/D/20231762 to The Roslin Institute.

644 This project has also received funding from the European Union's Horizon 2020 Programme for  
645 research, technological development and demonstration under the Grant Agreement no. 633184. This  
646 publication reflects the views only of the author, and not the European Commission (EC). The EC is  
647 not liable for any use that may be made of the information contained herein.

648 The funders had no role in study design, data collection and interpretation, or the decision to submit  
649 the work for publication.

650

## 651 **References**

- 652 1. Williams RB, Carlyle WW, Bond DR, Brown IA. 1999. The efficacy and economic  
653 benefits of Paracox, a live attenuated anticoccidial vaccine, in commercial trials with  
654 standard broiler chickens in the United Kingdom. *Int J Parasitol* 29:341-355.
- 655 2. Dalloul RA, Lillehoj HS. 2006. Poultry coccidiosis: recent advancements in control  
656 measures and vaccine development. *Expert Rev Vaccines* 5:143-163.

- 657 3. Long PL, Joyner LP. 1984. Problems in the identification of species of *Eimeria*. J  
658 Protozool 31:535-541.
- 659 4. Clark EL, Macdonald SE, Thenmozhi V, Kundu K, Garg R, Kumar S, Ayoade S, Fornace  
660 KM, Jatau ID, Moftah A, Nolan MJ, Sudhakar NR, Adebambo AO, Lawal IA, Alvarez  
661 Zapata R, Awuni JA, Chapman HD, Karimuribo E, Mugasa CM, Namangala B, Rushton  
662 J, Suo X, Thangaraj K, Srinivasa Rao AS, Tewari AK, Banerjee PS, Dhinakar Raj G,  
663 Raman M, Tomley FM, Blake DP. 2016. Cryptic *Eimeria* genotypes are common across  
664 the southern but not northern hemisphere. Int J Parasitol 46:537-544.
- 665 5. Long PL, Millard BJ. 1976. Studies on site finding and site specificity of *Eimeria praecox*,  
666 *Eimeria maxima* and *Eimeria acervulina* in chickens. Parasitology 73:327-336.
- 667 6. Yadav A, Gupta SK. 2001. Study of resistance against some ionophores in *Eimeria*  
668 *tenella* field isolates. Vet Parasitol 102:69-75.
- 669 7. Blake DP, Tomley FM. 2014. Securing poultry production from the ever-present *Eimeria*  
670 challenge. Trends Parasitol 30:12-19.
- 671 8. Bumstead JM, Bumstead N, Rothwell L, Tomley FM. 1995. Comparison of immune  
672 responses in inbred lines of chickens to *Eimeria maxima* and *Eimeria tenella*.  
673 Parasitology 111 ( Pt 2):143-151.
- 674 9. Smith AL, Hesketh P, Archer A, Shirley MW. 2002. Antigenic diversity in *Eimeria*  
675 *maxima* and the influence of host genetics and immunization schedule on cross-protective  
676 immunity. Infect Immun 70:2472-2479.
- 677 10. Blake DP, Hesketh P, Archer A, Shirley MW, Smith AL. 2006. *Eimeria maxima*: the  
678 influence of host genotype on parasite reproduction as revealed by quantitative real-time  
679 PCR. Int J Parasitol 36:97-105.
- 680 11. Lillehoj HS, Ruff MD. 1987. Comparison of disease susceptibility and subclass-specific  
681 antibody response in SC and FP chickens experimentally inoculated with *Eimeria tenella*,  
682 *E. acervulina*, or *E. maxima*. Avian Dis 31:112-119.

- 683 12. Lillehoj HS. 1986. Immune response during coccidiosis in SC and FP chickens. I. *In vitro*  
684 assessment of T cell proliferation response to stage-specific parasite antigens. *Vet*  
685 *Immunol Immunopathol* 13:321-330.
- 686 13. Smith NC, Wallach M, Miller CM, Morgenstern R, Braun R, Eckert J. 1994. Maternal  
687 transmission of immunity to *Eimeria maxima*: enzyme-linked immunosorbent assay  
688 analysis of protective antibodies induced by infection. *Infect Immun* 62:1348-1357.
- 689 14. Davis PJ, Parry SH, Porter P. 1978. The role of secretory IgA in anti-coccidial immunity  
690 in the chicken. *Immunology* 34:879-888.
- 691 15. Yun CH, Lillehoj HS, Zhu J, Min W. 2000. Kinetic differences in intestinal and systemic  
692 interferon-gamma and antigen-specific antibodies in chickens experimentally infected  
693 with *Eimeria maxima*. *Avian Dis* 44:305-312.
- 694 16. Rose ME, Hesketh P. 1979. Immunity to coccidiosis: T-lymphocyte- or B-lymphocyte-  
695 deficient animals. *Infect Immun* 26:630-637.
- 696 17. Bumstead N, Millard B. 1987. Genetics of resistance to coccidiosis: response of inbred  
697 chicken lines to infection by *Eimeria tenella* and *Eimeria maxima*. *Br Poult Sci* 28:705-  
698 715.
- 699 18. Rothwell L, Gramzinski RA, Rose ME, Kaiser P. 1995. Avian coccidiosis: changes in  
700 intestinal lymphocyte populations associated with the development of immunity to  
701 *Eimeria maxima*. *Parasite Immunol* 17:525-533.
- 702 19. Hong YH, Lillehoj HS, Lillehoj EP, Lee SH. 2006. Changes in immune-related gene  
703 expression and intestinal lymphocyte subpopulations following *Eimeria maxima* infection  
704 of chickens. *Vet Immunol Immunopathol* 114:259-272.
- 705 20. Djeraba A, Bernardet N, Dambrine G, Quere P. 2000. Nitric oxide inhibits Marek's  
706 disease virus replication but is not the single decisive factor in interferon-gamma-  
707 mediated viral inhibition. *Virology* 277:58-65.

- 708 21. Mallick AI, Haq K, Brisbin JT, Mian MF, Kulkarni RR, Sharif S. 2011. Assessment of  
709 bioactivity of a recombinant chicken interferon-gamma expressed using a baculovirus  
710 expression system. *J Interferon Cytokine Res* 31:493-500.
- 711 22. Kogut MH, Rothwell L, Kaiser P. 2005. IFN-gamma priming of chicken heterophils  
712 upregulates the expression of proinflammatory and Th1 cytokine mRNA following  
713 receptor-mediated phagocytosis of *Salmonella enterica* serovar enteritidis. *J Interferon*  
714 *Cytokine Res* 25:73-81.
- 715 23. Heriveau C, Dimier-Poisson I, Lowenthal J, Naciri M, Quere P. 2000. Inhibition of  
716 *Eimeria tenella* replication after recombinant IFN-gamma activation in chicken  
717 macrophages, fibroblasts and epithelial cells. *Vet Parasitol* 92:37-49.
- 718 24. Lillehoj HS, Choi KD. 1998. Recombinant chicken interferon-gamma-mediated  
719 inhibition of *Eimeria tenella* development *in vitro* and reduction of oocyst production and  
720 body weight loss following *Eimeria acervulina* challenge infection. *Avian Dis* 42:307-  
721 314.
- 722 25. Lowenthal JW, York JJ, O'Neil TE, Rhodes S, Prowse SJ, Strom DG, Digby MR. 1997.  
723 *In vivo* effects of chicken interferon-gamma during infection with *Eimeria*. *J Interferon*  
724 *Cytokine Res* 17:551-558.
- 725 26. Yun CH, Lillehoj HS, Choi KD. 2000. *Eimeria tenella* infection induces local gamma  
726 interferon production and intestinal lymphocyte subpopulation changes. *Infect Immun*  
727 68:1282-1288.
- 728 27. Rothwell L, Young JR, Zoorob R, Whittaker CA, Hesketh P, Archer A, Smith AL, Kaiser  
729 P. 2004. Cloning and characterization of chicken IL-10 and its role in the immune  
730 response to *Eimeria maxima*. *J Immunol* 173:2675-2682.
- 731 28. Haritova AM, Stanilova SA. 2012. Enhanced expression of IL-10 in contrast to IL-12B  
732 mRNA in poultry with experimental coccidiosis. *Exp Parasitol* 132:378-382.

- 733 29. Wu Z, Hu T, Rothwell L, Vervelde L, Kaiser P, Boulton K, Nolan MJ, Tomley FM,  
734 Blake DP, Hume DA. 2016. Analysis of the function of IL-10 in chickens using specific  
735 neutralising antibodies and a sensitive capture ELISA. *Dev Comp Immunol* 63:206-212.
- 736 30. Arendt MK, Sand JM, Marccone TM, Cook ME. 2016. Interleukin-10 neutralizing  
737 antibody for detection of intestinal luminal levels and as a dietary additive in *Eimeria*  
738 challenged broiler chicks. *Poult Sci* 95:430-438.
- 739 31. Psifidi A, Hesketh P, Stebbings A, Archer A, Salmon N, Matika O, Banos G, Bumstead N,  
740 Smith A, Kaiser P. 2013. Identification of SNP markers for resistance to coccidiosis in  
741 chickens, p 16. Abstract from Proceedings of the 8th European Poultry Genetics  
742 Symposium. Venice, ITALY.
- 743 32. Boulton K, Nolan MJ, Wu Z, Riggio V, Matika O, Harman K, Hocking PM, Bumstead N,  
744 Hesketh P, Archer A, Bishop SC, Kaiser P, Tomley FM, Hume DA, Smith AL, Blake DP,  
745 Psifidi A. 2018. Dissecting the Genomic Architecture of Resistance to *Eimeria maxima*  
746 Parasitism in the Chicken. *Front Genet* 9:528.
- 747 33. Guo P, Thomas JD, Bruce MP, Hinton TM, Bean AG, Lowenthal JW. 2013. The chicken  
748 TH1 response: potential therapeutic applications of ChIFN-gamma. *Dev Comp Immunol*  
749 41:389-396.
- 750 34. Staines K, Hunt LG, Young JR, Butter C. 2014. Evolution of an expanded mannose  
751 receptor gene family. *PLoS One* 9:e110330.
- 752 35. Gobel TW, Chen CL, Shrimpf J, Grossi CE, Bernot A, Bucy RP, Auffray C, Cooper MD.  
753 1994. Characterization of avian natural killer cells and their intracellular CD3 protein  
754 complex. *Eur J Immunol* 24:1685-1691.
- 755 36. Vervelde L, Jeurissen SH. 1993. Postnatal development of intra-epithelial leukocytes in  
756 the chicken digestive tract: phenotypical characterization in situ. *Cell Tissue Res*  
757 274:295-301.

- 758 37. Jansen CA, van de Haar PM, van Haarlem D, van Kooten P, de Wit S, van Eden W,  
759 Viertlbock BC, Gobel TW, Vervelde L. 2010. Identification of new populations of  
760 chicken natural killer (NK) cells. *Dev Comp Immunol* 34:759-767.
- 761 38. Lillehoj HS. 1989. Intestinal intraepithelial and splenic natural killer cell responses to  
762 eimerian infections in inbred chickens. *Infect Immun* 57:1879-1884.
- 763 39. Wakelin D, Rose ME, Hesketh P, Else KJ, Grecnis RK. 1993. Immunity to coccidiosis:  
764 genetic influences on lymphocyte and cytokine responses to infection with *Eimeria*  
765 *vermiformis* in inbred mice. *Parasite Immunol* 15:11-19.
- 766 40. Choi KD, Lillehoj HS, Zalenga DS. 1999. Changes in local IFN-gamma and TGF-beta4  
767 mRNA expression and intraepithelial lymphocytes following *Eimeria acervulina* infection.  
768 *Vet Immunol Immunopathol* 71:263-275.
- 769 41. Vervelde L, Vermeulen AN, Jeurissen SH. 1996. In situ characterization of leucocyte  
770 subpopulations after infection with *Eimeria tenella* in chickens. *Parasite Immunol* 18:247-  
771 256.
- 772 42. Couper KN, Blount DG, Riley EM. 2008. IL-10: the master regulator of immunity to  
773 infection. *J Immunol* 180:5771-5777.
- 774 43. Chan IH, Wu V, Bilardello M, Mar E, Oft M, Van Vlasselaer P, Mumm JB. 2015. The  
775 Potentiation of IFN-gamma and Induction of Cytotoxic Proteins by Pegylated IL-10 in  
776 Human CD8 T Cells. *J Interferon Cytokine Res* 35:948-955.
- 777 44. Sand JM, Arendt MK, Repasy A, Deniz G, Cook ME. 2016. Oral antibody to interleukin-  
778 10 reduces growth rate depression due to *Eimeria* spp. infection in broiler chickens. *Poult*  
779 *Sci* 95:439-446.
- 780 45. Shanmugasundaram R, Sifri M, Selvaraj RK. 2013. Effect of yeast cell product (CitriStim)  
781 supplementation on broiler performance and intestinal immune cell parameters during an  
782 experimental coccidial infection. *Poult Sci* 92:358-363.

- 783 46. Cai CW, Blase JR, Zhang X, Eickhoff CS, Hoft DF. 2016. Th17 Cells Are More  
784 Protective Than Th1 Cells Against the Intracellular Parasite *Trypanosoma cruzi*. *PLoS*  
785 *Pathog* 12:e1005902.
- 786 47. Korn T, Bettelli E, Oukka M, Kuchroo VK. 2009. IL-17 and Th17 Cells. *Annu Rev*  
787 *Immunol* 27:485-517.
- 788 48. Noack M, Miossec P. 2014. Th17 and regulatory T cell balance in autoimmune and  
789 inflammatory diseases. *Autoimmun Rev* 13:668-677.
- 790 49. Kolls JK, Khader SA. 2010. The role of Th17 cytokines in primary mucosal immunity.  
791 *Cytokine Growth Factor Rev* 21:443-448.
- 792 50. Veldhoen M. 2017. Interleukin 17 is a chief orchestrator of immunity. *Nat Immunol*  
793 18:612-621.
- 794 51. Kim WH, Jeong J, Park AR, Yim D, Kim YH, Kim KD, Chang HH, Lillehoj HS, Lee BH,  
795 Min W. 2012. Chicken IL-17F: identification and comparative expression analysis in  
796 *Eimeria*-infected chickens. *Dev Comp Immunol* 38:401-409.
- 797 52. Zhang L, Liu R, Song M, Hu Y, Pan B, Cai J, Wang M. 2013. *Eimeria tenella*: interleukin  
798 17 contributes to host immunopathology in the gut during experimental infection. *Exp*  
799 *Parasitol* 133:121-130.
- 800 53. Del Cacho E, Gallego M, Lillehoj HS, Quilez J, Lillehoj EP, Ramo A, Sanchez-Acedo C.  
801 2014. IL-17A regulates *Eimeria tenella* schizont maturation and migration in avian  
802 coccidiosis. *Vet Res* 45:25.
- 803 54. Skak K, Frederiksen KS, Lundsgaard D. 2008. Interleukin-21 activates human natural  
804 killer cells and modulates their surface receptor expression. *Immunology* 123:575-583.
- 805 55. Wendt K, Wilk E, Buyny S, Schmidt RE, Jacobs R. 2007. Interleukin-21 differentially  
806 affects human natural killer cell subsets. *Immunology* 122:486-495.
- 807 56. Perez-Mazliah D, Ng DH, Freitas do Rosario AP, McLaughlin S, Mastelic-Gavillet B,  
808 Sodenkamp J, Kushinga G, Langhorne J. 2015. Disruption of IL-21 signaling affects T



- 809 cell-B cell interactions and abrogates protective humoral immunity to malaria. *PLoS*  
810 *Pathog* 11:e1004715.
- 811 57. Yi JS, Cox MA, Zajac AJ. 2010. Interleukin-21: a multifunctional regulator of immunity  
812 to infections. *Microbes Infect* 12:1111-1119.
- 813 58. Shi F, Erf GF. 2012. IFN-gamma, IL-21, and IL-10 co-expression in evolving  
814 autoimmune vitiligo lesions of Smyth line chickens. *J Invest Dermatol* 132:642-649.
- 815 59. Pot C, Jin H, Awasthi A, Liu SM, Lai CY, Madan R, Sharpe AH, Karp CL, Miaw SC, Ho  
816 IC, Kuchroo VK. 2009. Cutting edge: IL-27 induces the transcription factor c-Maf,  
817 cytokine IL-21, and the costimulatory receptor ICOS that coordinately act together to  
818 promote differentiation of IL-10-producing Tr1 cells. *J Immunol* 183:797-801.
- 819 60. Jeurissen SH, Janse EM, Vermeulen AN, Vervelde L. 1996. *Eimeria tenella* infections in  
820 chickens: aspects of host-parasite: interaction. *Vet Immunol Immunopathol* 54:231-238.
- 821 61. Watrang E, Thebo P, Lunden A, Dalgaard TS. 2016. Monitoring of local CD8beta-  
822 expressing cell populations during *Eimeria tenella* infection of naive and immune  
823 chickens. *Parasite Immunol* 38:453-467.
- 824 62. Swinkels WJ, Post J, Cornelissen JB, Engel B, Boersma WJ, Rebel JM. 2007. Immune  
825 responses to an *Eimeria acervulina* infection in different broilers lines. *Vet Immunol*  
826 *Immunopathol* 117:26-34.
- 827 63. Jenkins MC, Augustine PC, Danforth HD, Barta JR. 1991. X-irradiation of *Eimeria*  
828 *tenella* oocysts provides direct evidence that sporozoite invasion and early schizont  
829 development induce a protective immune response(s). *Infect Immun* 59:4042-4048.
- 830 64. Vervelde L, Jeurissen SH. 1995. The role of intra-epithelial and lamina propria leucocytes  
831 during infection with *Eimeria tenella*. *Adv Exp Med Biol* 371B:953-958.
- 832 65. Norton CC, Joyner LP. 1975. The development of drug-resistant strains of *Eimeria*  
833 *maxima* in the laboratory. *Parasitology* 71:153-165.
- 834 66. Long PL, Millard BJ, Joyner LP, Norton CC. 1976. A guide to laboratory techniques used  
835 in the study and diagnosis of avian coccidiosis. *Folia Vet Lat* 6:201-217.

- 836 67. Johnson J, Reid WM. 1970. Anticoccidial drugs: lesion scoring techniques in battery and  
837 floor-pen experiments with chickens. *Exp Parasitol* 28:30-36.
- 838 68. Nolan MJ, Tomley FM, Kaiser P, Blake DP. 2015. Quantitative real-time PCR (qPCR)  
839 for *Eimeria tenella* replication--Implications for experimental refinement and animal  
840 welfare. *Parasitol Int* 64:464-470.
- 841 69. Li YP, Bang DD, Handberg KJ, Jorgensen PH, Zhang MF. 2005. Evaluation of the  
842 suitability of six host genes as internal control in real-time RT-PCR assays in chicken  
843 embryo cell cultures infected with infectious bursal disease virus. *Vet Microbiol* 110:155-  
844 165.
- 845 70. Sutton KM, Hu T, Wu Z, Siklodi B, Vervelde L, Kaiser P. 2015. The functions of the  
846 avian receptor activator of NF-kappaB ligand (RANKL) and its receptors, RANK and  
847 osteoprotegerin, are evolutionarily conserved. *Dev Comp Immunol* 51:170-184.
- 848 71. Kaiser P, Rothwell L, Galyov EE, Barrow PA, Burnside J, Wigley P. 2000. Differential  
849 cytokine expression in avian cells in response to invasion by *Salmonella typhimurium*,  
850 *Salmonella enteritidis* and *Salmonella gallinarum*. *Microbiology* 146 Pt 12:3217-3226.
- 851 72. Bolger AM, Lohse M, Usadel B. 2014. Trimmomatic: a flexible trimmer for Illumina  
852 sequence data. *Bioinformatics* 30:2114-2120.
- 853 73. Dobin A, Davis CA, Schlesinger F, Drenkow J, Zaleski C, Jha S, Batut P, Chaisson M,  
854 Gingeras TR. 2013. STAR: ultrafast universal RNA-seq aligner. *Bioinformatics* 29:15-21.
- 855 74. Liao Y, Smyth GK, Shi W. 2014. featureCounts: an efficient general purpose program for  
856 assigning sequence reads to genomic features. *Bioinformatics* 30:923-930.
- 857 75. Robinson MD, McCarthy DJ, Smyth GK. 2010. edgeR: a Bioconductor package for  
858 differential expression analysis of digital gene expression data. *Bioinformatics* 26:139-  
859 140.
- 860 76. Theocharidis A, van Dongen S, Enright AJ, Freeman TC. 2009. Network visualization  
861 and analysis of gene expression data using BioLayout Express(3D). *Nat Protoc* 4:1535-  
862 1550.

863 **Table 1. Number of differentially expressed genes (DEGs)**

| Contrast                                 | Total number of DEGs <sup>1</sup> |      | Immune-related genes (%) <sup>2</sup> |      |
|------------------------------------------|-----------------------------------|------|---------------------------------------|------|
|                                          | Up                                | Down | Up                                    | Down |
| Line 15I infected vs. control at 2 dpi   | 3                                 | 2    | 0                                     | 0    |
| Line 15I infected vs. control at 4 dpi   | 1                                 | 2    | 0                                     | 0    |
| Line 15I infected vs. control at 6 dpi   | 845                               | 279  | 24.7                                  | 4.5  |
| Line 15I infected vs. control at 8 dpi   | 303                               | 335  | 14.8                                  | 6.6  |
| Line C.B12 infected vs. control at 2 dpi | 12                                | 1    | 0                                     | 100  |
| Line C.B12 infected vs. control at 4 dpi | 68                                | 109  | 42.2                                  | 0    |
| Line C.B12 infected vs. control at 6 dpi | 314                               | 352  | 17.2                                  | 9.6  |
| Line C.B12 infected vs. control at 8 dpi | 48                                | 123  | 29.6                                  | 9.6  |

864 <sup>1</sup>The threshold: FDR < 0.05 and abs FC > 1.6.

865 <sup>2</sup>Immune-related genes are the percentage of genes with human orthologs in which the human ortholog is  
866 categorized as having immune function.

867

868

869 **Table 2. Correlation of IFN- $\gamma$  and IL-10 in serum and jejunum with *E. maxima* replication**

|               |        | Line 15I          | Line C.B12        |
|---------------|--------|-------------------|-------------------|
| IFN- $\gamma$ | Serum  | 0.52<br>(p<0.001) | 0.19<br>(p=0.25)  |
|               | Tissue | 0.51<br>(p<0.001) | 0.63<br>(p<0.001) |
| IL-10         | Serum  | 0.74<br>(p<0.001) | 0.61<br>(p<0.001) |
|               | Tissue | 0.64<br>(p<0.001) | 0.57<br>(p<0.001) |

870

871 **Table 3. Primers and probes used in RT-qPCR**

| Target Gene | Primers and Probe Sequences                            | Standard RNA               | Accession Number |
|-------------|--------------------------------------------------------|----------------------------|------------------|
| <i>28S</i>  | Probe 5' (FAM)-AGGACCGCTACGGACCTCCACCA-(TAMRA) 3'      | HD11 stimulated with LPS   | X59733           |
|             | Forward 5'-GGCGAAGCCAGAGGAAACT-3'                      |                            |                  |
|             | Reverse 5'-GACGACCGATTTGCACGTC-3'                      |                            |                  |
| <i>IL2</i>  | Probe 5' (FAM)-ACTGAGACCCAGGAGTGCACCCAGC-(TAMRA) 3'    | ExCOS-7 IL-2 mRNA          | AJ009800         |
|             | Forward 5'-TTGGAAAATATCAAGAACAAGATTCATC-3'             |                            |                  |
|             | Reverse 5'-TCCCAGGTAACACTGCAGAGTTT-3'                  |                            |                  |
| <i>IL6</i>  | Probe 5' (FAM)-AGGAGAAATGCCTGACGAAGCTCTCCA-(TAMRA) 3'  | ExCOS-7 IL-6 mRNA          | AJ309540         |
|             | Forward 5'-GCTCGCCGGCTTCGA-3'                          |                            |                  |
|             | Reverse 5'-GGTAGGTCTGAAAGGCGAACAG-3'                   |                            |                  |
| <i>IL10</i> | Probe 5' (FAM)-CCAACTGCTCAGCTCTGAACTGCTGGAT-(TAMRA) 3' | ExCOS-7 IL-10 mRNA         | AJ621614         |
|             | Forward 5'-GAAATTAAGGACTATTTTCAATCCAGAGA-3'            |                            |                  |
|             | Reverse 5'-ACAGACTGGCAGCCAAAGGT-3'                     |                            |                  |
| <i>IL21</i> | Probe 5' (FAM)-TGCTGCATACACCAGAAAACCCTGGG-(TAMRA) 3'   | ExCOS-7 IL-21 mRNA         | AM773757         |
|             | Forward 5'-AAAAGATGTGGTGAAAGATAAGGATGT-3'              |                            |                  |
|             | Reverse 5'-GCTGTGAGCAGGCATCCA-3'                       |                            |                  |
| <i>IFNG</i> | Probe 5' (FAM)-TGGCCAAGCTCCCGATGAACGA-(TAMRA) 3'       | ExCOS-7 IFN- $\gamma$ mRNA | Y07922           |
|             | Forward 5'-GTGAAGAAGGTGAAAGATATCATGGA-3'               |                            |                  |
|             | Reverse 5'-GCTTTGCGCTGGATTCTCA-3'                      |                            |                  |

873 **Table 4. Antibodies used in IHC staining**

| Antibody                                        | Specificity                                                                                      | Clone | Dilution | Reference                     |
|-------------------------------------------------|--------------------------------------------------------------------------------------------------|-------|----------|-------------------------------|
| Mouse anti-chicken CD4                          | Chicken CD4                                                                                      | CT-4  | 1:400    | Chan <i>et al.</i> (1988)     |
| Mouse anti-chicken CD8 $\alpha$                 | Chicken CD8 $\alpha$                                                                             | 3-298 | 1:400    | Luhtala <i>et al.</i> (1995)  |
| Mouse anti-chicken TCR $\gamma\delta$           | Chicken TCR $\gamma\delta$                                                                       | TCR1  | 1:400    | Chen <i>et al.</i> (1988)     |
| Mouse anti-chicken TCR $\alpha\beta/\nu\beta_1$ | Chicken TCR $\alpha\beta_1$                                                                      | TCR2  | 1:400    | Chen <i>et al.</i> (1988)     |
| Mouse anti-chicken monocyte/macrophage          | Chicken mannose receptor 1 (MRC1) on monocytes, macrophages, interdigitating cells and microglia | KUL01 | 1:800    | Mast <i>et al.</i> (1998)     |
| Mouse anti-chicken Bu-1/ChB6                    | Chicken chB6, present on B cells and epithelial NK cells                                         | AV20  | 1:800    | Rothwell <i>et al.</i> (1996) |

874

875

876 **Figure legends**

877 **Figure 1. Body weight gains and parasite replication in line C.B12 and 15I chickens following *E. maxima***  
878 **infection.** Three-week-old birds were orally infected with 100 sporulated *E. maxima* oocysts ( $n = 5$  per line)  
879 or sterile water ( $n = 3$  per line). (A) Percentage of body weight gains were calculated for individual birds from  
880 2 days prior to inoculation to time of culling at time points as indicated. The results were presented as the  
881 mean percentage of body weight gain and error bars represent standard deviation. (B) *Eimeria maxima*  
882 replication was quantified by qPCR targeting the MIC1 gene. The results were presented as the ratios of  
883 parasite genome vs host genome copy numbers for individual birds. Matching letters indicate significant  
884 differences between the two lines at  $p < 0.05$  on the same day ( $n = 5$  per time point).

885 **Figure 2. A network graph of unbiased sample-to-sample and gene-to-gene clustering.** The sample-  
886 sample network shown on the left-hand side is coloured based on treatment group, while the right-hand  
887 network is coloured by Markov clustering of samples (A). Gene-gene network graph of Markov clustered  
888 genes (B), includes normalised expression across samples (mean-centered scaling) of each cluster in the  
889 surrounding charts. Genes in cluster 5 (C) including IFN- $\gamma$  and IL-10 have strongly elevated expression at 6  
890 dpi in both lines of chickens, but also earlier at 4 dpi in line C.B12 chickens. Pathways enriched in cluster 5  
891 are shown in (D).

892 **Figure 3: Ingenuity pathway analysis during *E. maxima* infection in line 15I at 6 (A) and 8 (B) dpi and**  
893 **line C.B12 chickens at 4 (C) and 6 (D) dpi.** Colour based on Z-score with orange indicating activated  
894 pathways and blue indicating de-activated pathways.

895 **Figure 4. Comparison of line 15I and C.B12 chickens during *E. maxima* infection.** Heatmap (A) showing  
896 genes that presented the highest mean fold difference between lines. Functional pathway analysis (B) and  
897 predicted upstream regulators in both lines (C) are presented with colour based on Z-score; orange indicating  
898 activated pathways or regulators and blue indicating de-activated pathways or regulators.

899 **Figure 5: Kinetics of *IFNG* and *IL10* mRNA transcription by RNA-Seq (A) and RT-qPCR (B), protein**  
900 **levels in the jejunum (C) and protein levels in the serum (D) of *E. maxima*-infected chickens.** Three-  
901 week old birds were orally inoculated with 100 oocysts of *E. maxima* (solid markers) or sterile water (control  
902 birds; hollow markers) and jejunum and serum samples collected at various days post-infection as indicated.  
903 Data are presented as individual birds. For RT-qPCR data, the relative quantity (RQ) of mRNA transcription  
904 of individual infected birds was calculated relative to the mean of control birds of the same line at individual  
905 time points and normalised using the 28S reference gene. Matching letters denote significant differences  
906 between groups on the same day ( $p < 0.05$ ,  $n = 3$  for control and  $n = 5$  for infected groups). C; control. I; infected.  
907 Line C.B12 shown as red circles, line 15I as blue squares.

908 **Figure 6. Kinetics of *IL21* mRNA transcription (A) and protein expression (B) in the jejunum and IL-21**  
909 **protein levels in the serum (C) of *E. maxima*-infected chickens.** Three-week old birds were orally  
910 inoculated with 100 oocysts of *E. maxima* or sterile water (control birds) and jejunum and serum samples  
911 collected at various days post-infection as indicated. Data are presented as individual birds. For RT-qPCR  
912 data, the relative quantity (RQ) of mRNA transcription of individual infected birds was calculated relative to  
913 the mean of control birds of the same line at individual time points and normalised using the 28S reference  
914 gene. Matching letters denote significant differences between groups on the same day ( $p < 0.05$ ,  $n = 3$  for  
915 control and  $n = 5$  for infected groups). C; control. I; infected.

916 **Figure 7. Populations of CD4, CD8 $\alpha$ ,  $\gamma\delta$  T cells,  $\alpha\beta$ 1 T cells, chB6 and MRC1L-B LPLs (A) and IEL (B)**  
917 **in the jejunal villi of line C.B12 and line 15I chickens at 4 dpi with *E. maxima*.** Shown are data comparing  
918 control birds of both lines, infected birds of both lines, control and infected line C.B12 birds and control and  
919 infected line 15I birds. LPLs and IEL were counted from nine villi of one section per bird ( $n = 3$  for uninfected  
920 and  $n = 5$  for infected groups). Each bar represents the mean number of cells per 300  $\mu$ m of villus ( $\pm$  SD).  
921 Matching letters denote significant differences between groups ( $p < 0.05$ ). C; Control. I; infected.

922



923 **Figure 1.**

924 **A**

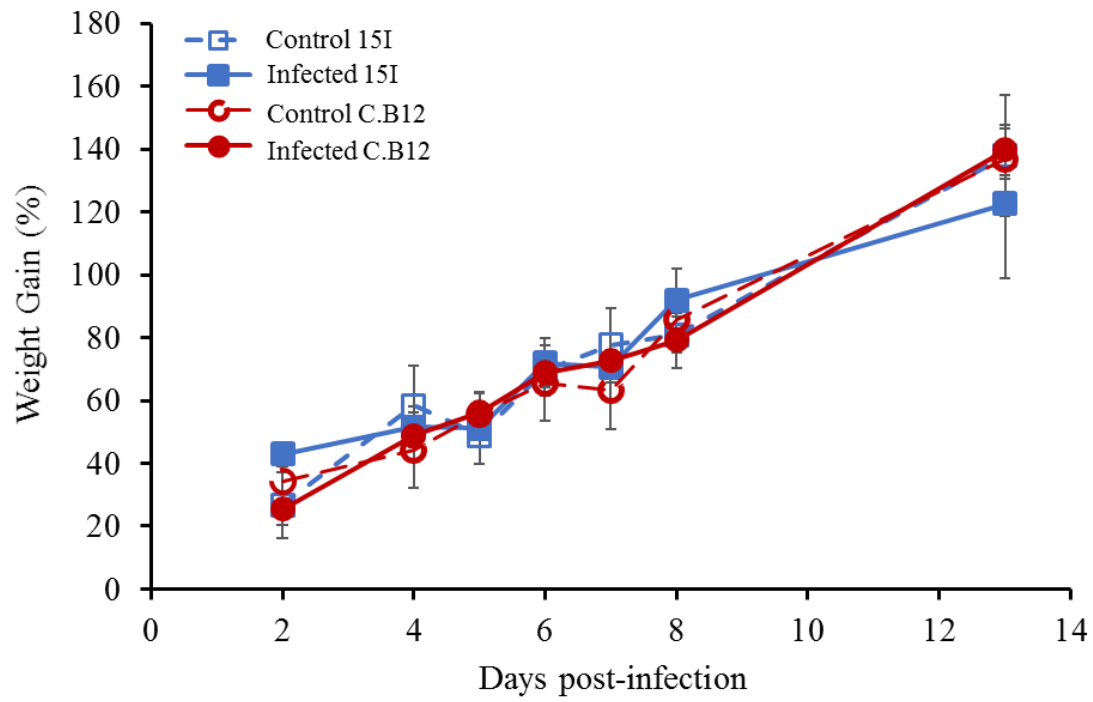

925

926 **B**

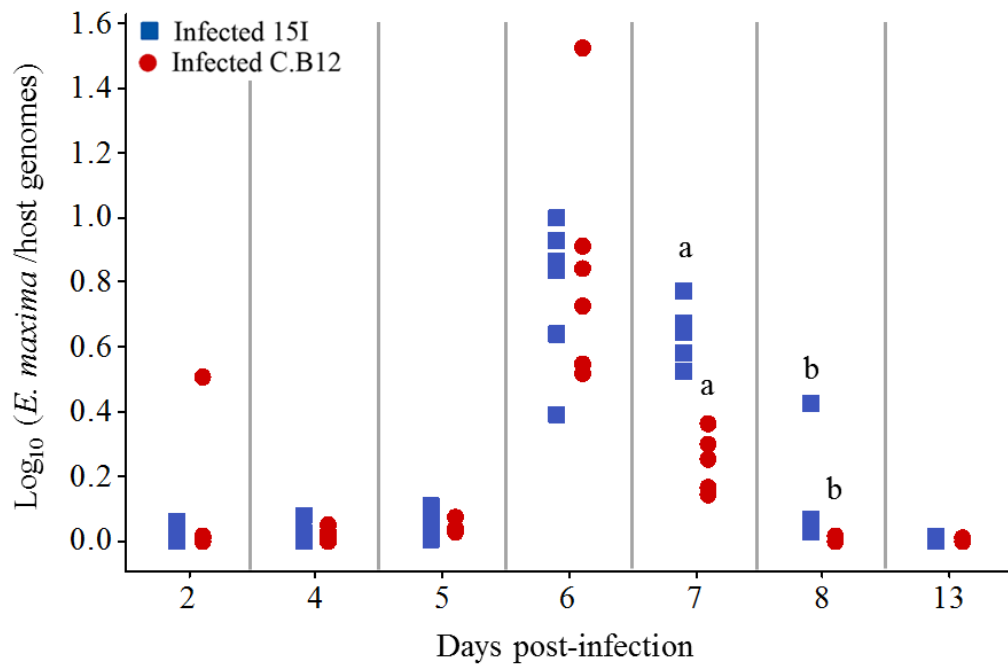

927

928 **Figure 2.**

929 **A**

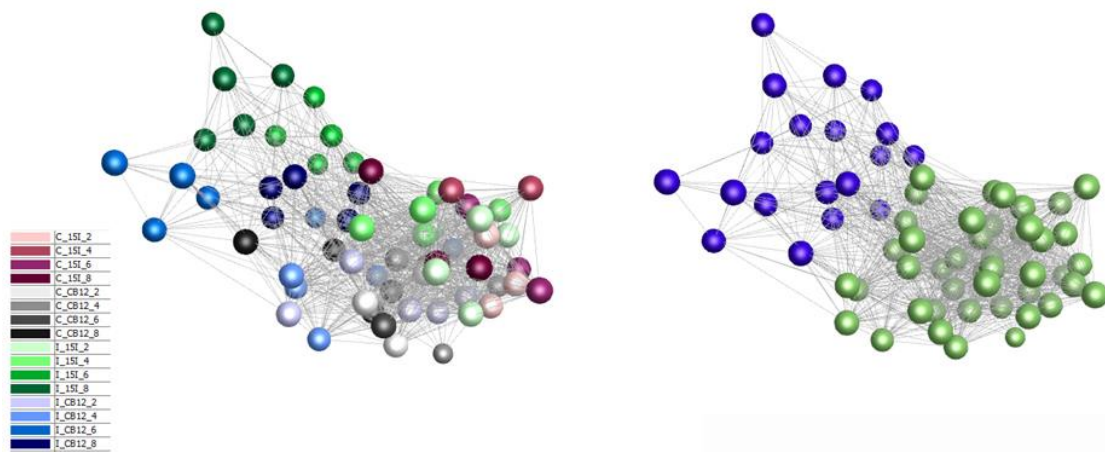

931 **B**

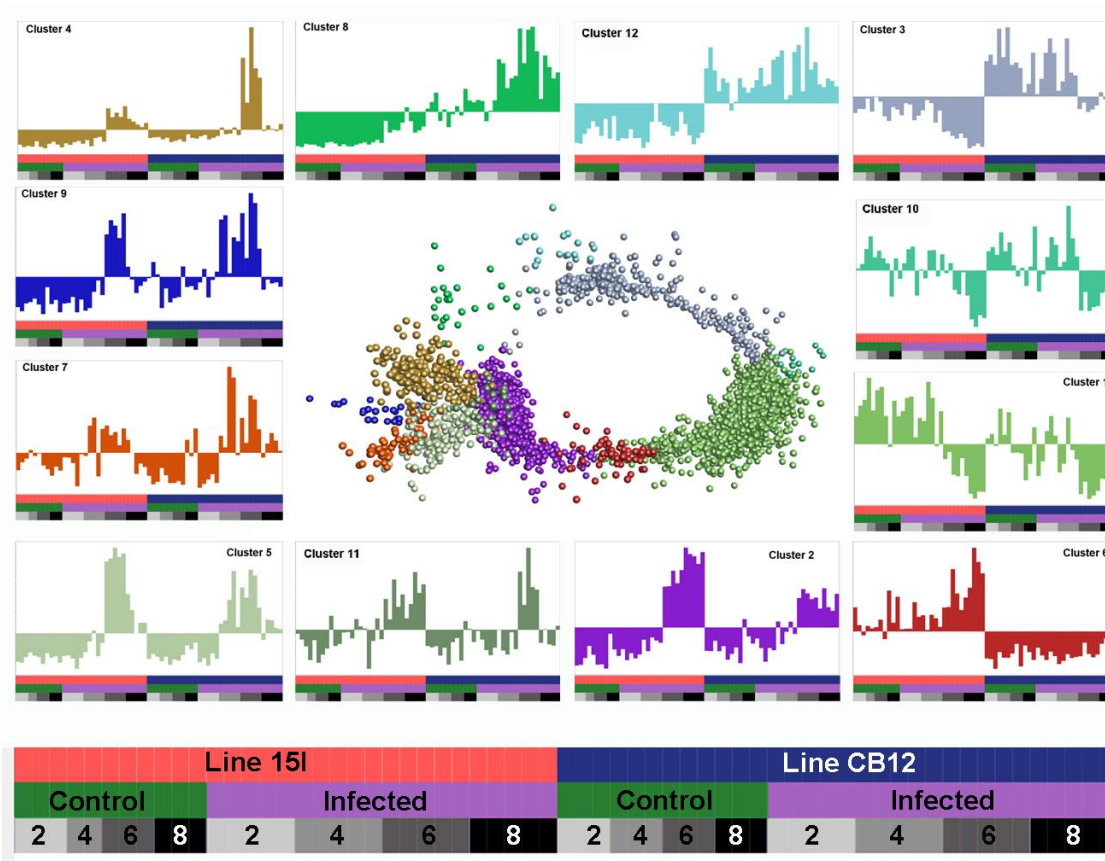

Cluster 5 (163 genes)

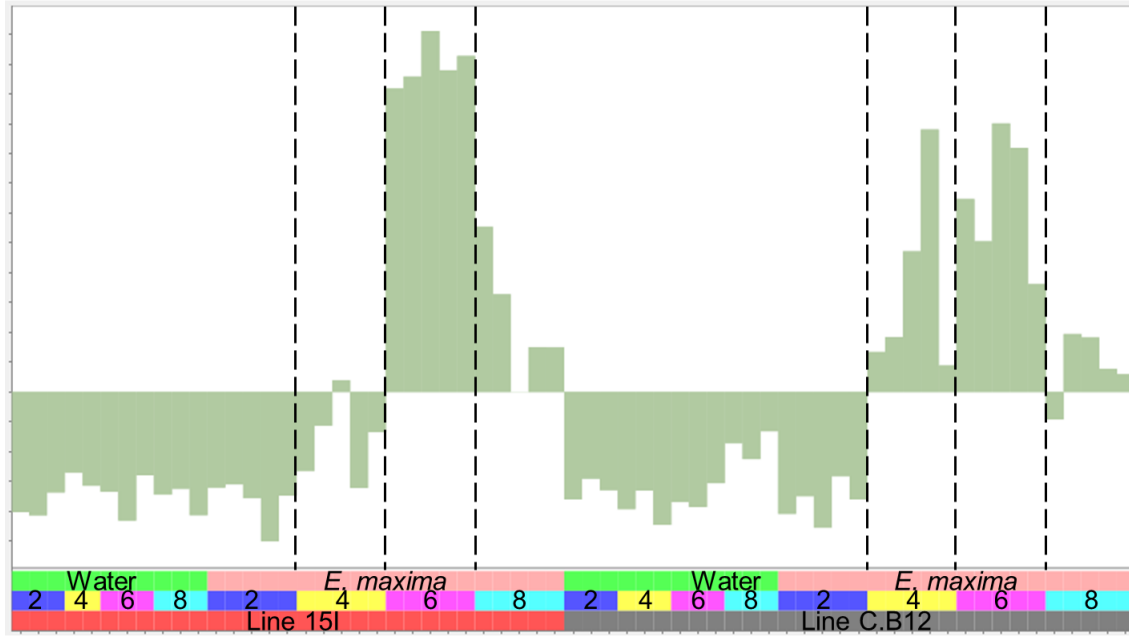

937

938

939 D

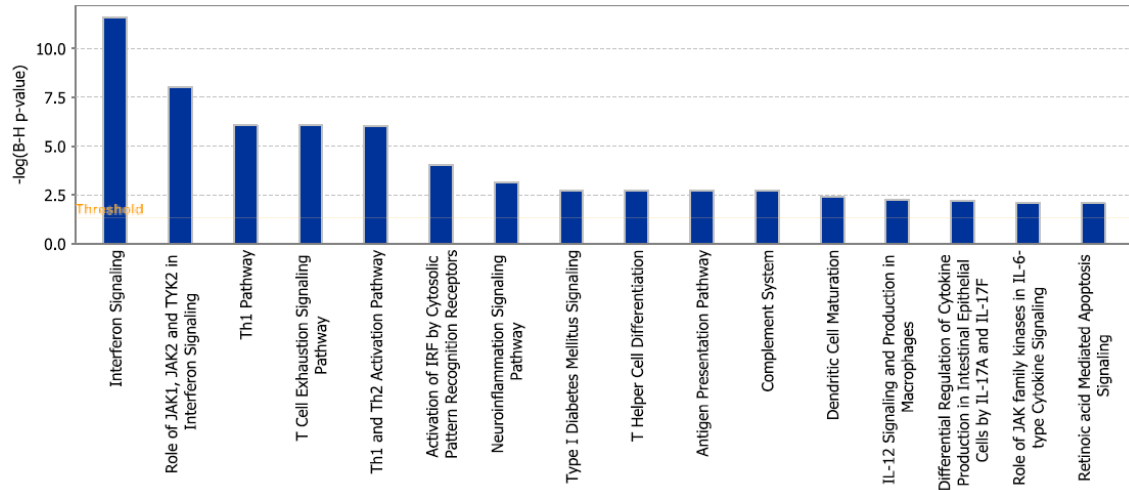

940

941

942

943

944 **Figure 3.**

945 **A**

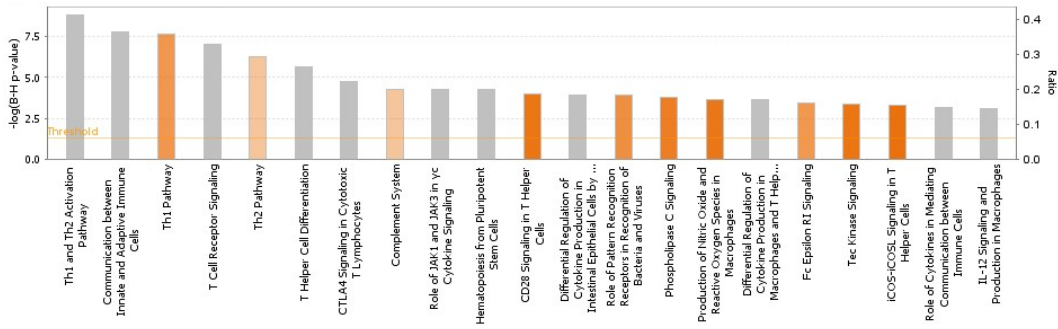

946 **B**

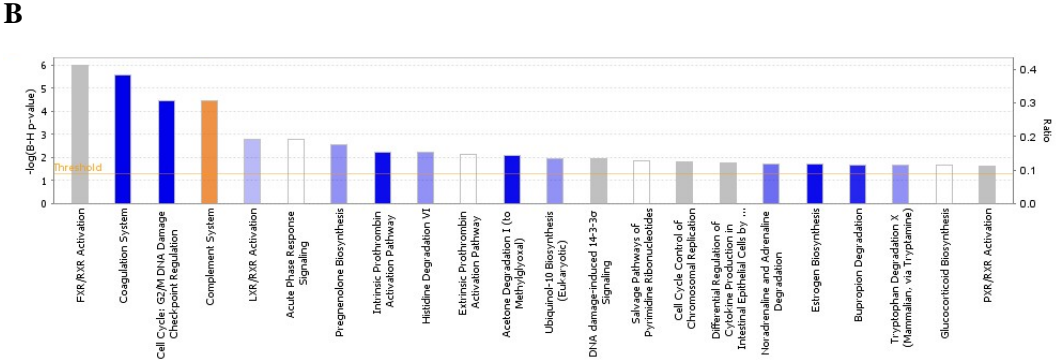

947 **C**

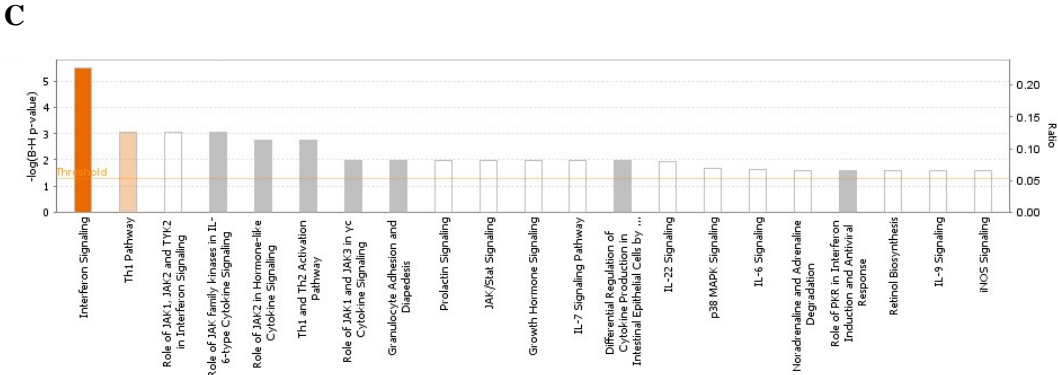

948 **D**

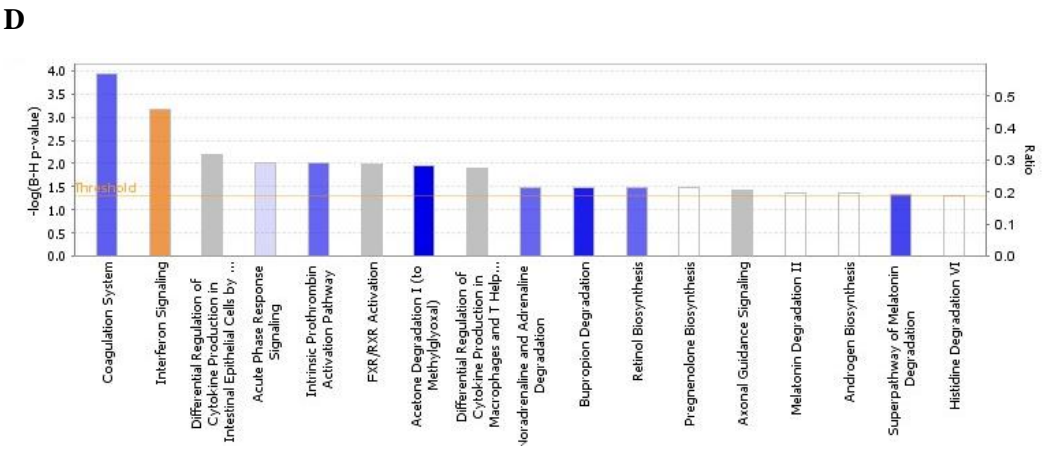

949 **E**

950 **F**

951 **G**

952 **H**

953 **Figure 4.**

954 **A**

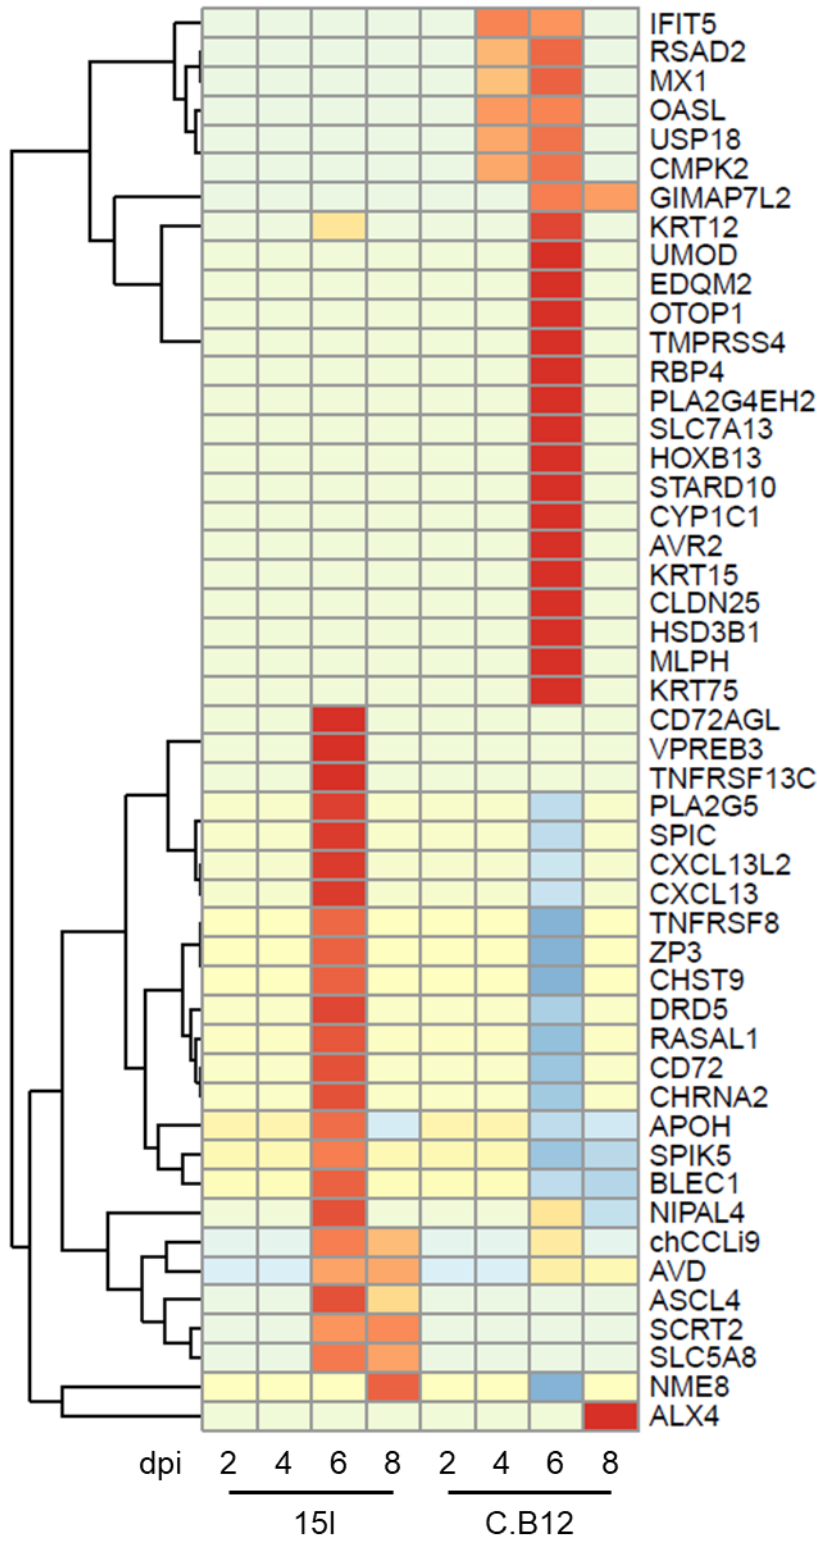

955

956 **B**

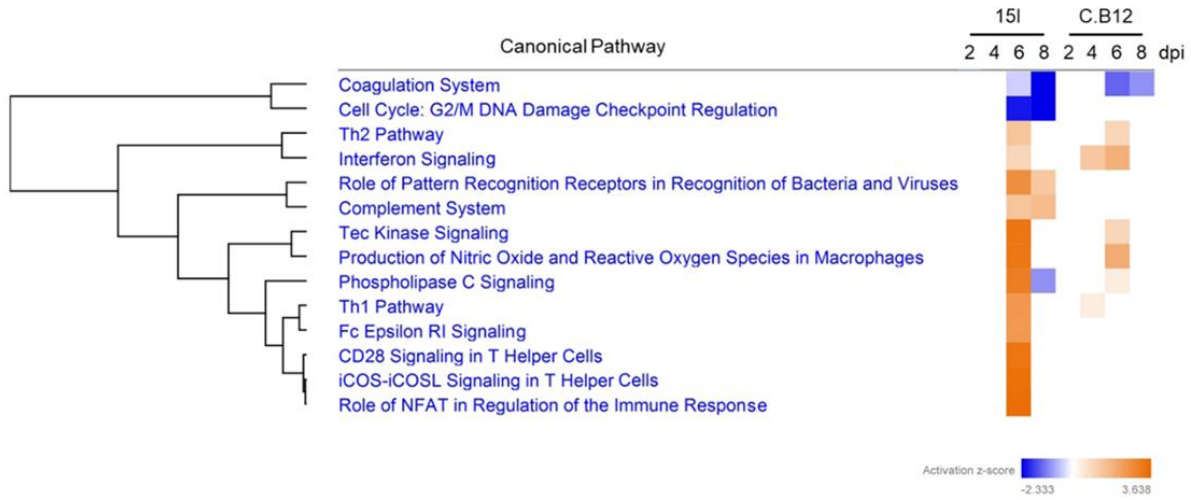

957

958 **C**

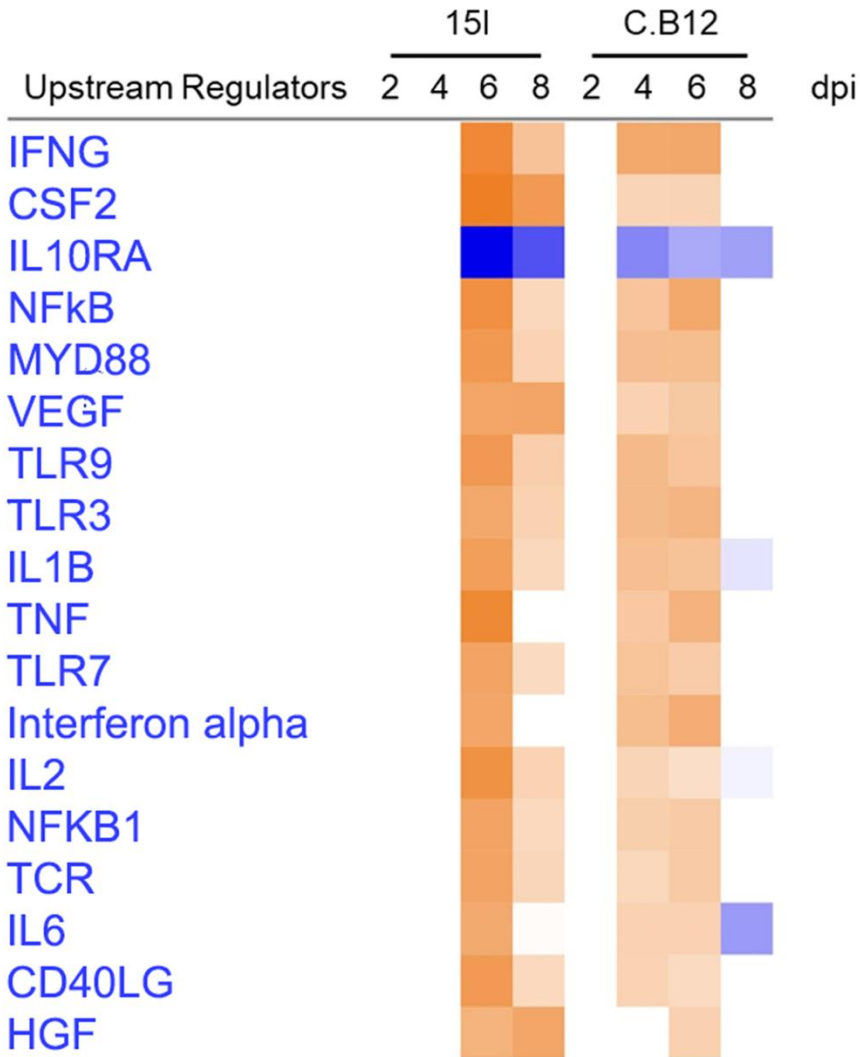

959

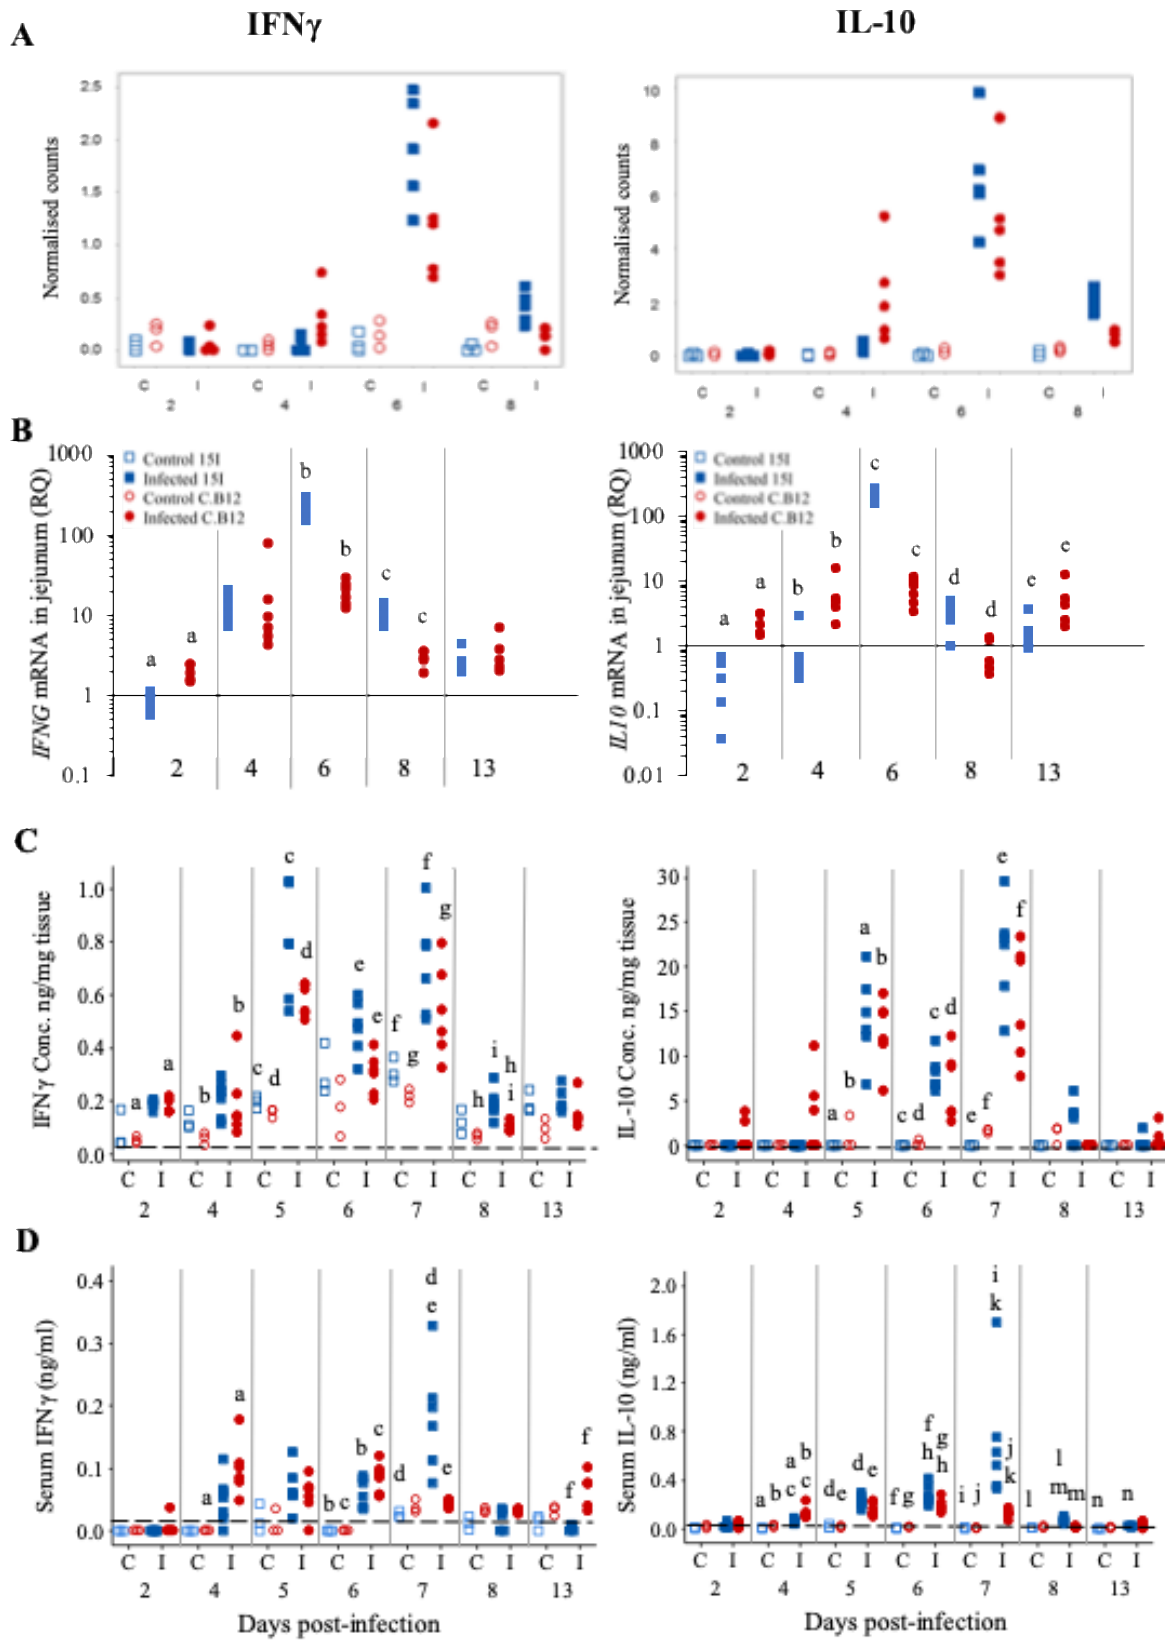

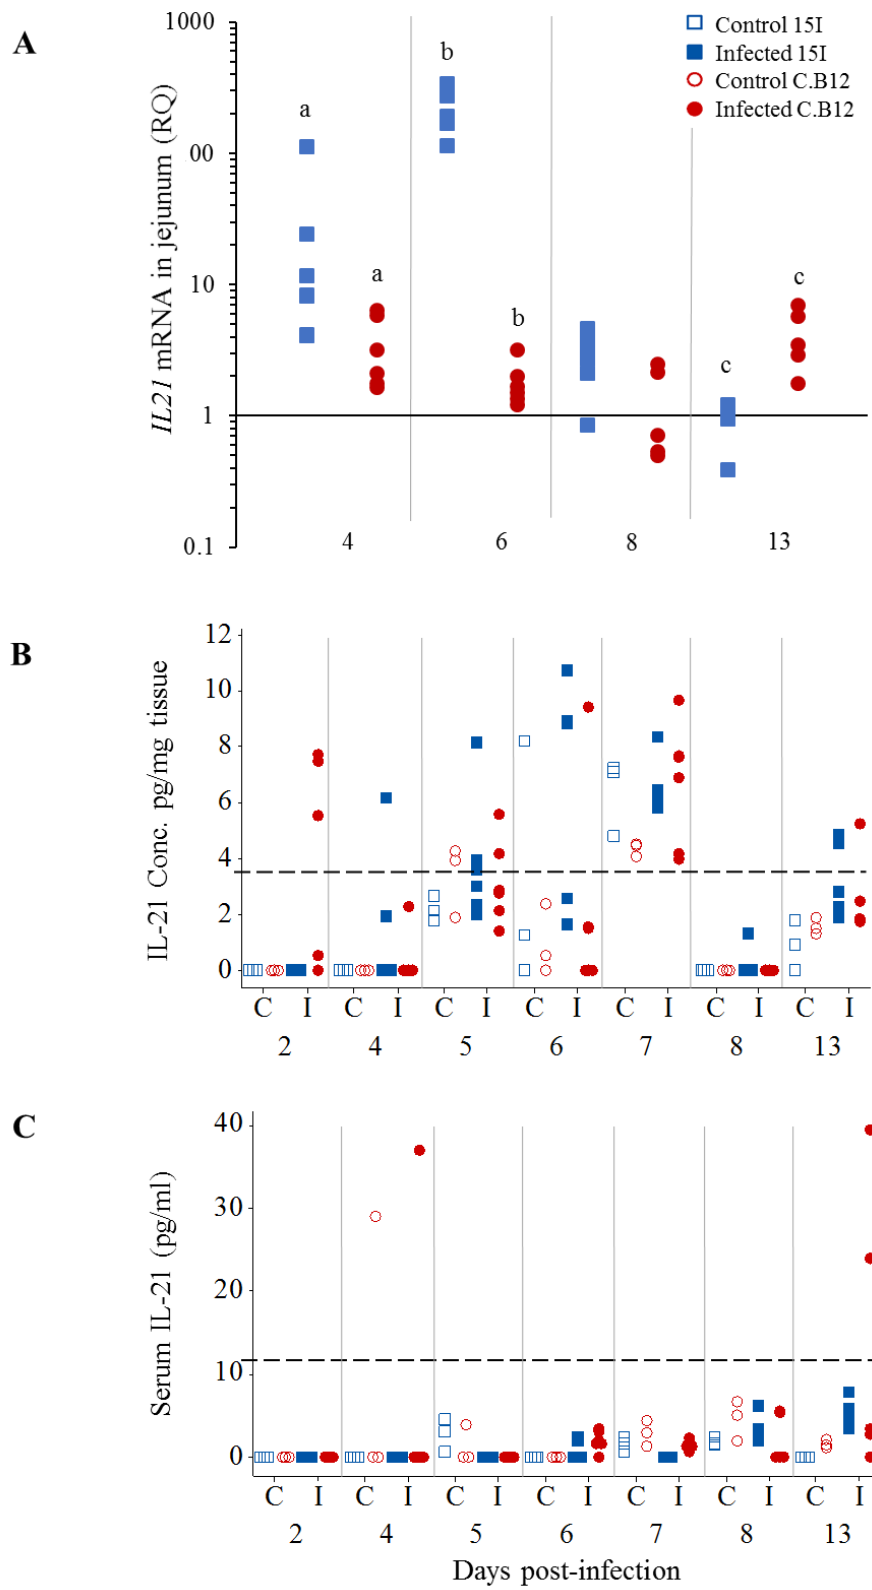



965 **A**

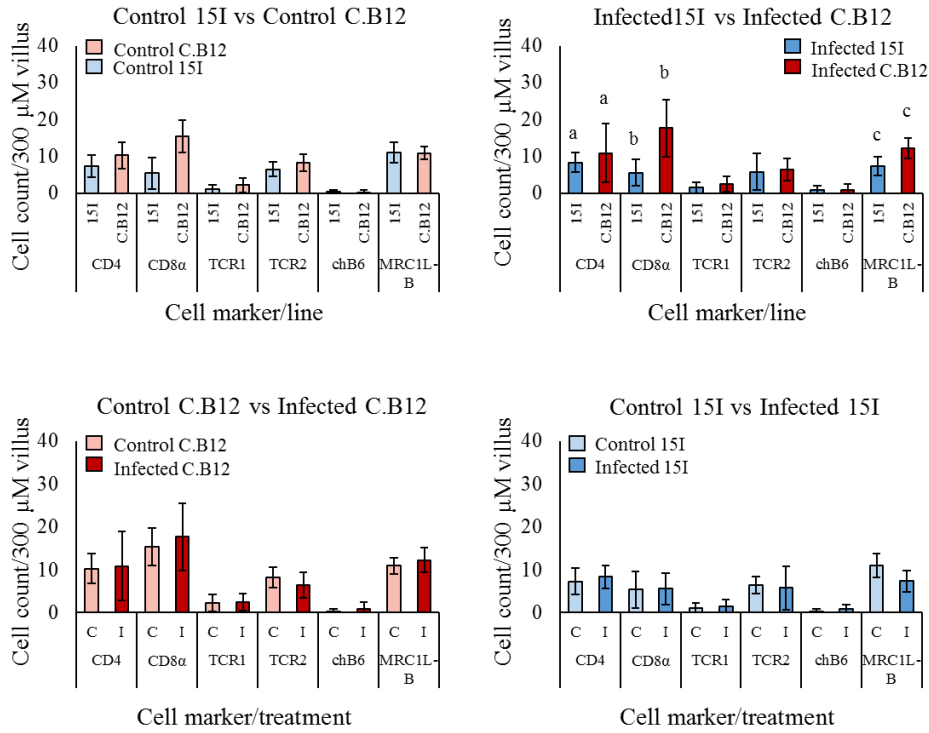

966

967 **B**

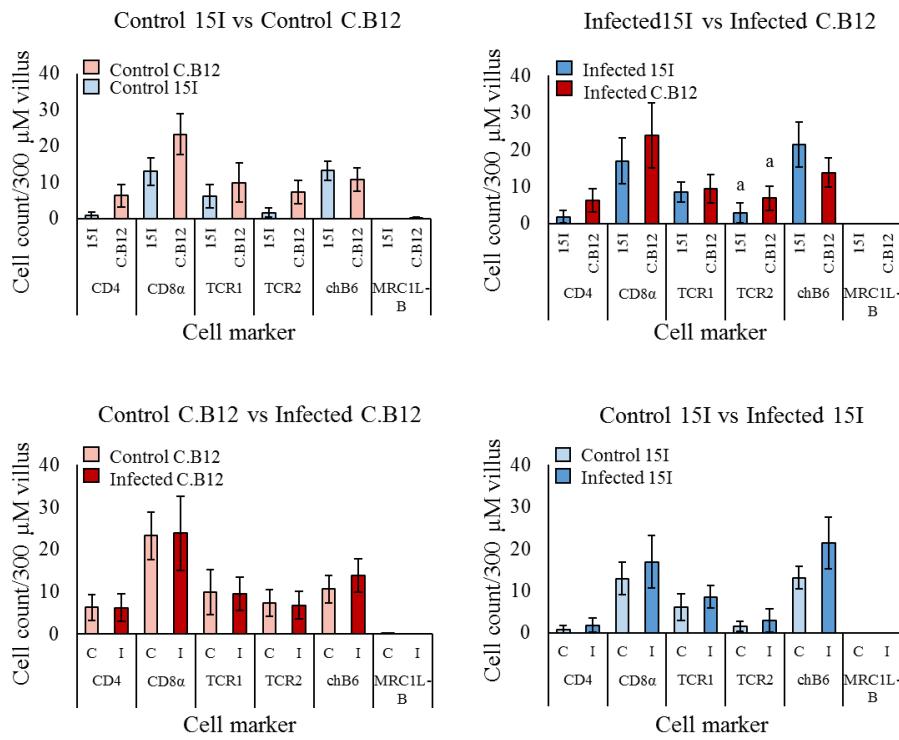

968

Figure 1.

A

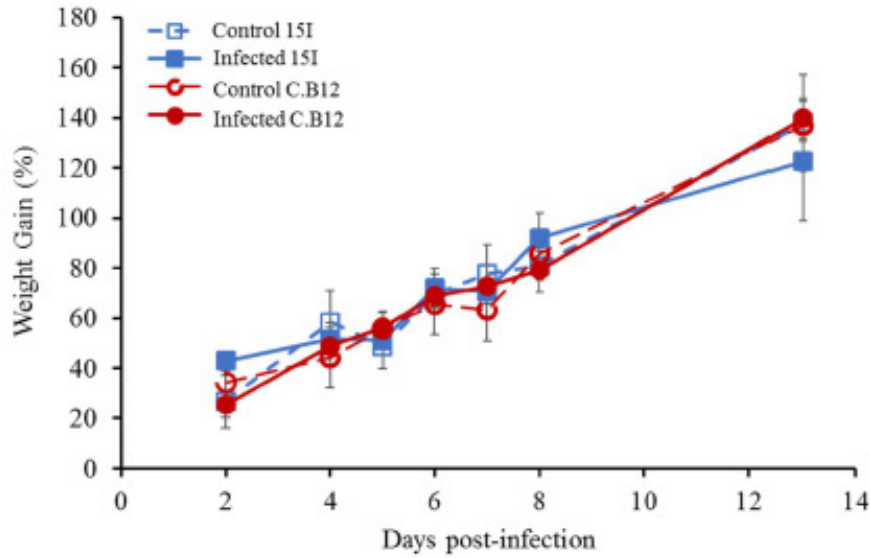

B

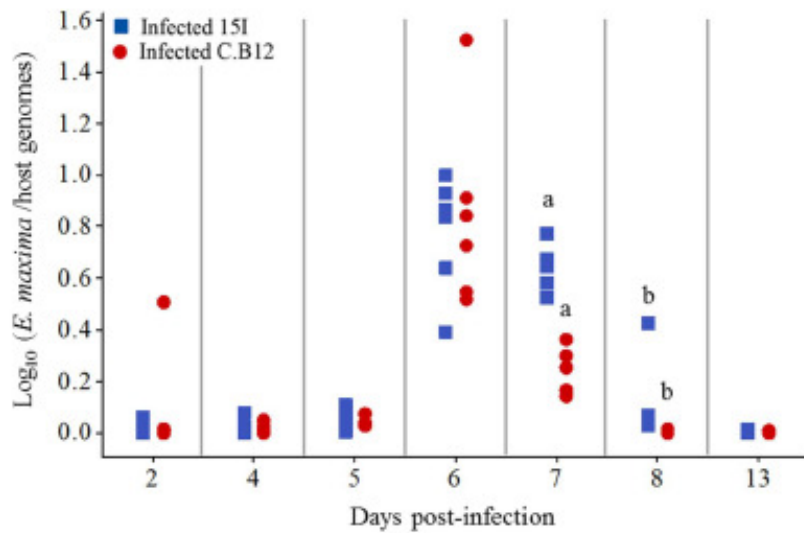

**Figure 1. Body weight gains and parasite replication in line C.B12 and 15I chickens following *E. maxima* infection.** Three-week-old birds were orally infected with 100 sporulated *E. maxima* oocysts ( $n = 5$  per line) or sterile water ( $n = 3$  per line). (A) Percentage of body weight gains were calculated for individual birds from 2 days prior to inoculation to time of culling at time points as indicated. The results were presented as the mean percentage of body weight gain and error bars represent standard deviation. (B) *Eimeria maxima* replication was quantified by qPCR targeting the MIC1 gene. The results were presented as the ratios of parasite genome vs host genome copy numbers for individual birds. Matching letters indicate significant differences between the two lines at  $p < 0.05$  on the same day ( $n = 5$  per time point).

Figure 2.

A

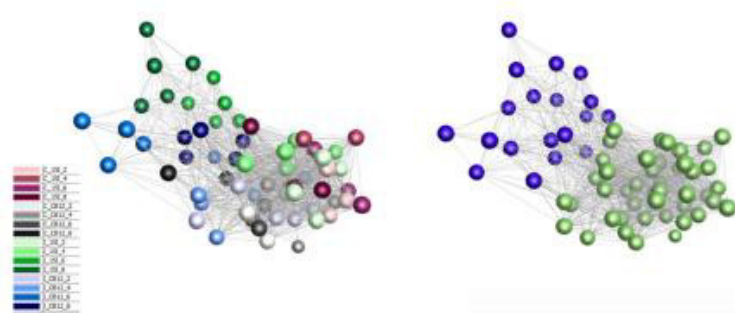

B

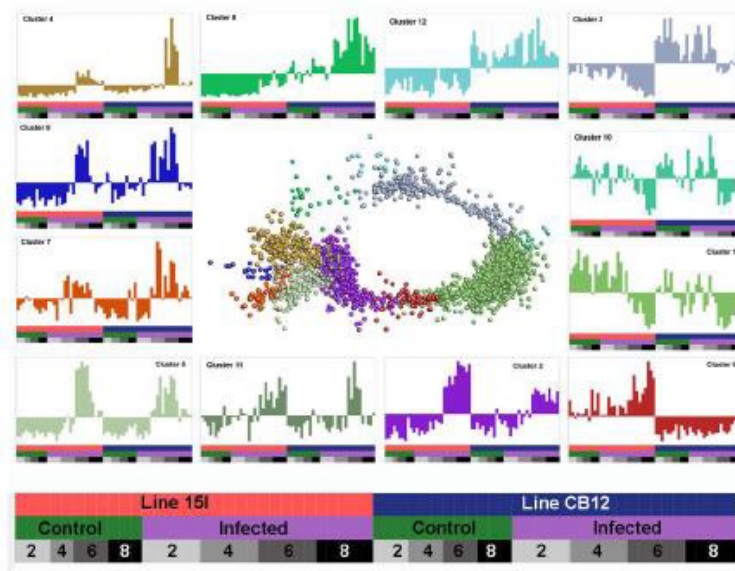

C

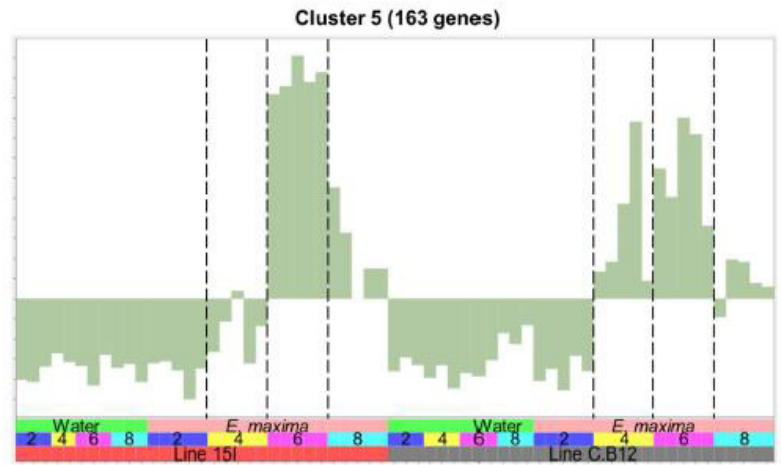

D

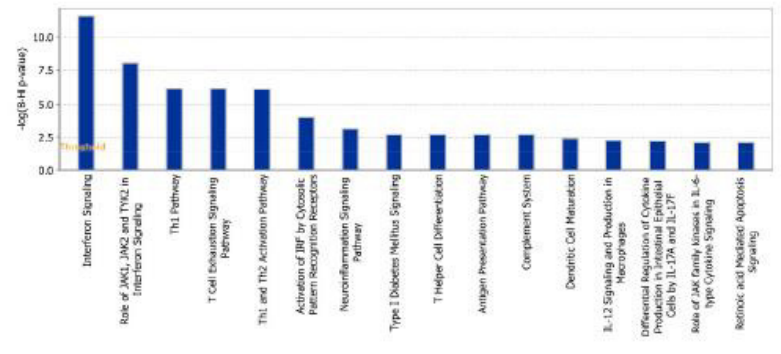

**Figure 2. A network graph of unbiased sample-to-sample and gene-to-gene clustering.** The sample-sample network shown on the left-hand side is coloured based on treatment group, while the right-hand network is coloured by Markov clustering of samples (A). Gene-gene network graph of Markov clustered genes (B), includes normalised expression across samples (mean-centered scaling) of each cluster in the surrounding charts. Genes in cluster 5 (C) including IFN- $\gamma$  and IL-10 have strongly elevated expression at 6 dpi in both lines of chickens, but also earlier at 4 dpi in line C.B12 chickens. Pathways enriched in cluster 5 are shown in (D).

Figure 3.

A

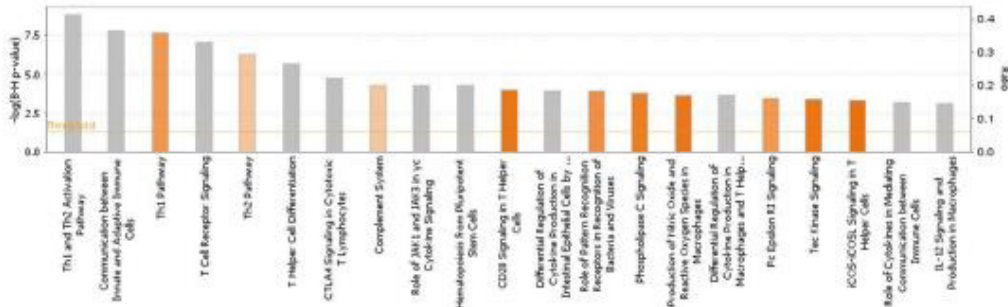

B

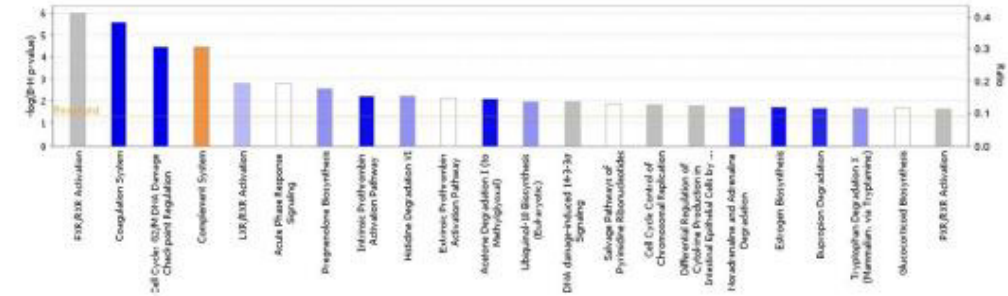

C

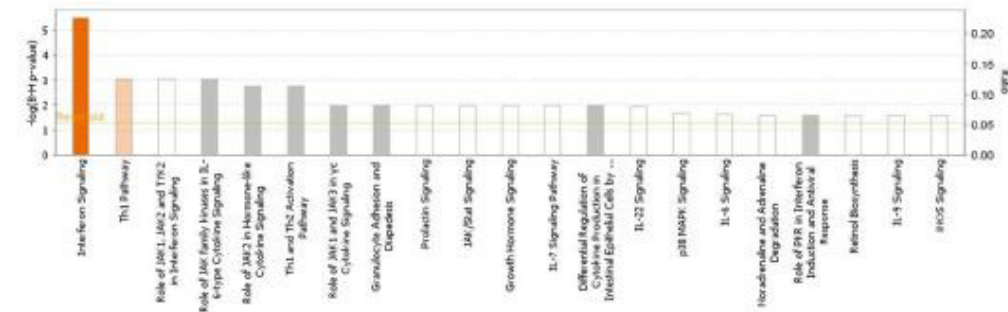

D

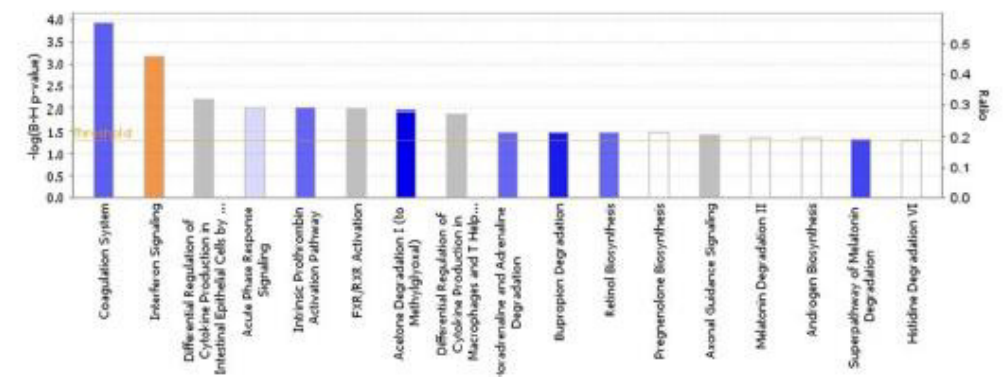

Figure 3: Ingenuity pathway analysis during *E. maxima* infection in line 15I at 6 (A) and 8 (B) dpi and line C.B12 chickens at 4 (C) and 6 (D) dpi. Colour based on Z-score with orange indicating activated pathways and blue indicating de-activated pathways.

Figure 4.

A

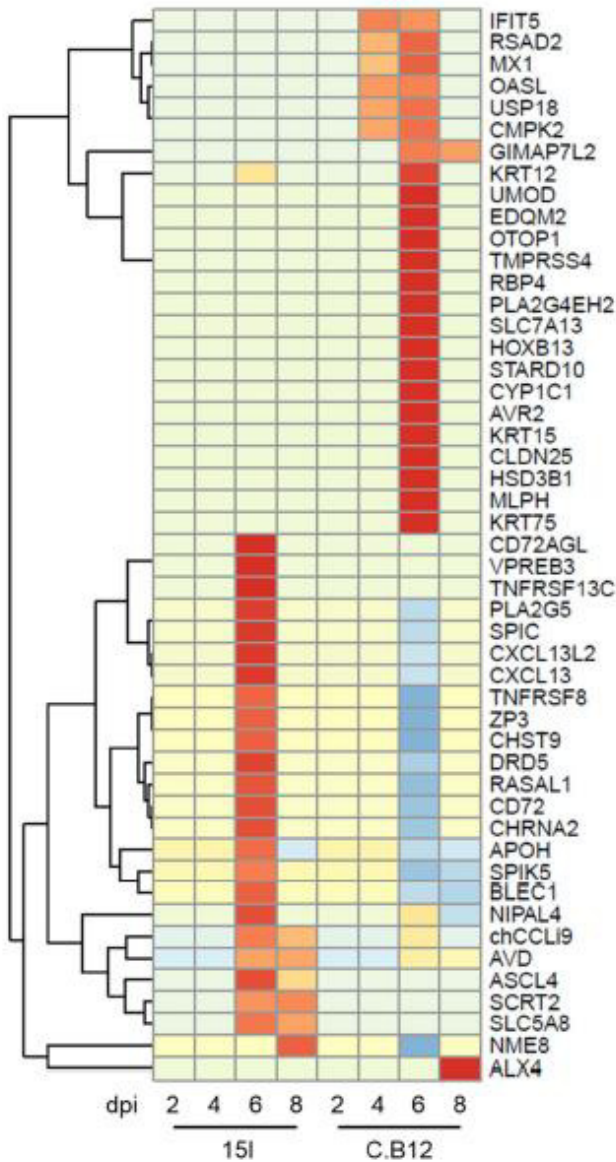

B

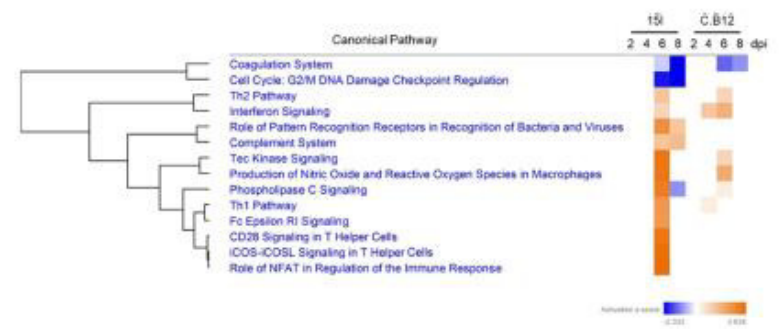

C

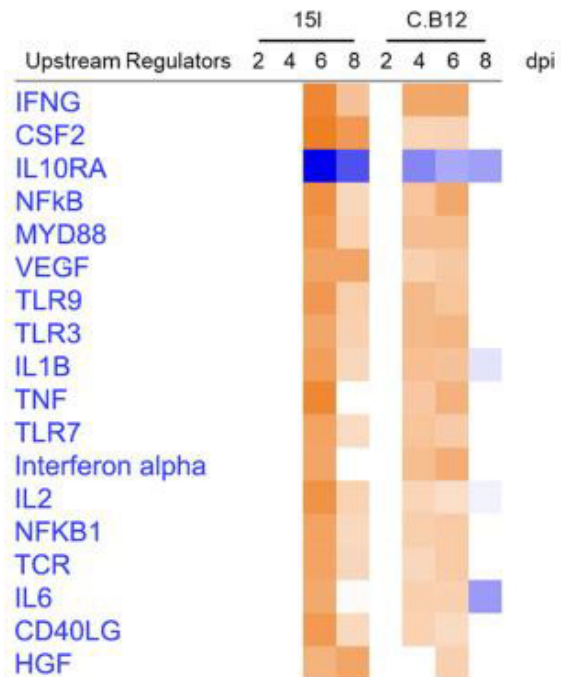

**Figure 4. Comparison of line 15I and C.B12 chickens during *E. maxima* infection.** Heatmap (A) showing genes that presented the highest mean fold difference between lines. Functional pathway analysis (B) and predicted upstream regulators in both lines (C) are presented with colour based on Z-score; orange indicating activated pathways or regulators and blue indicating de-activated pathways or regulators.



Figure 5.

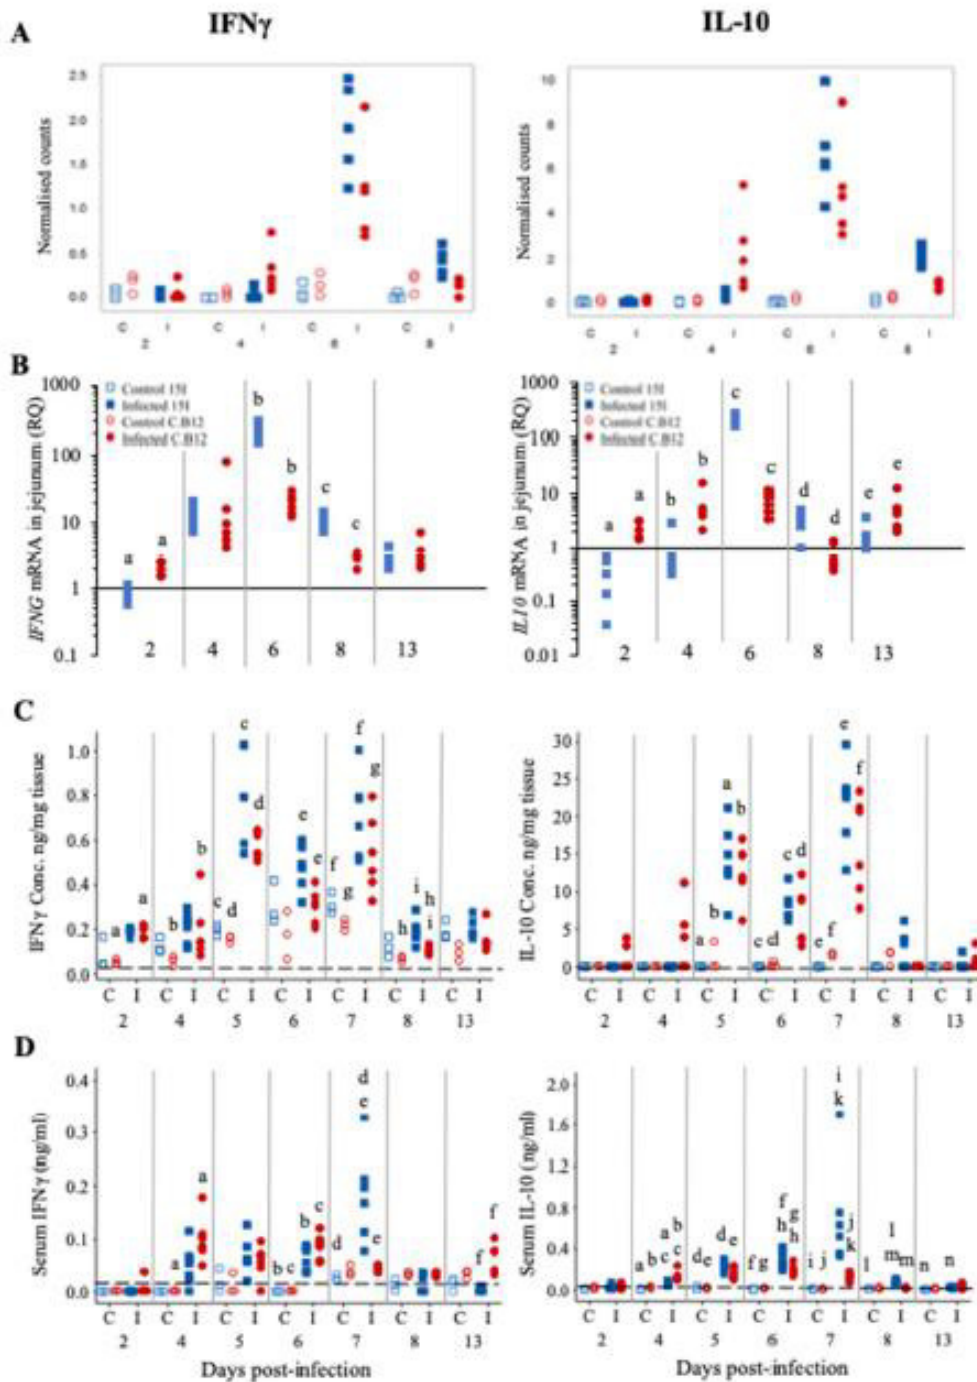

**Figure 5: Kinetics of *IFNG* and *IL10* mRNA transcription by RNA-Seq (A) and RT-qPCR (B), protein levels in the jejunum (C) and protein levels in the serum (D) of *E. maxima*-infected chickens.** Three-week old birds were orally inoculated with 100 oocysts of *E. maxima* (solid markers) or sterile water (control birds; hollow markers) and jejunum and serum samples collected at various days post-infection as indicated. Data are presented as individual birds. For RT-qPCR data, the relative quantity (RQ) of mRNA transcription of individual infected birds was calculated relative to the mean of control birds of the same line at individual time points and normalised using the 28S reference gene. Matching letters denote significant differences between groups on the same day ( $p < 0.05$ ,  $n = 3$  for control and  $n = 5$  for infected groups). C; control. I; infected. Line C.B12 shown as red circles, line 15I as blue squares.

Figure 6.

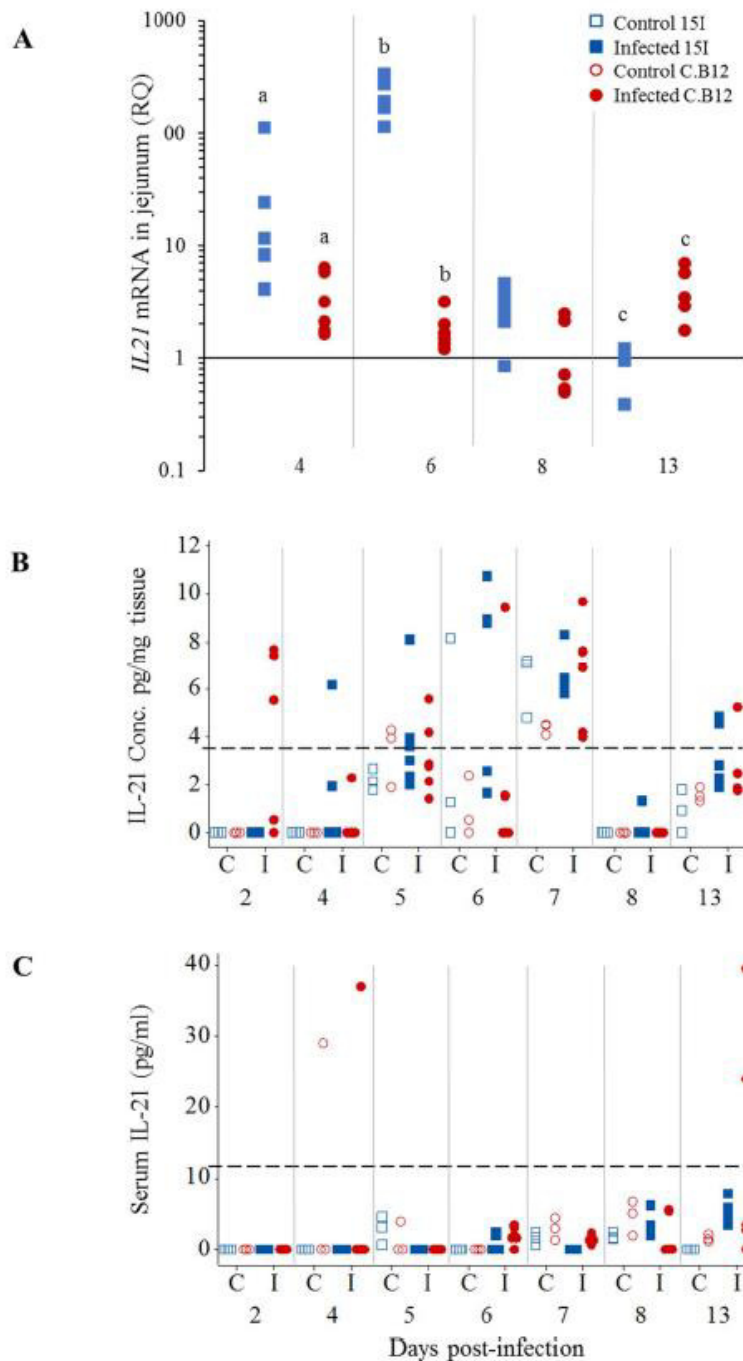

**Figure 6. Kinetics of *IL21* mRNA transcription (A) and protein expression (B) in the jejunum and IL-21 protein levels in the serum (C) of *E. maxima*-infected chickens.** Three-week old birds were orally inoculated with 100 oocysts of *E. maxima* or sterile water (control birds) and jejunum and serum samples collected at various days post-infection as indicated. Data are presented as individual birds. For RT-qPCR data, the relative quantity (RQ) of mRNA transcription of individual infected birds was calculated relative to the mean of control birds of the same line at individual time points and normalised using the 28S reference gene. Matching letters denote significant differences between groups on the same day ( $p < 0.05$ ,  $n = 3$  for control and  $n = 5$  for infected groups). C; control. I; infected.

Figure 7.

A

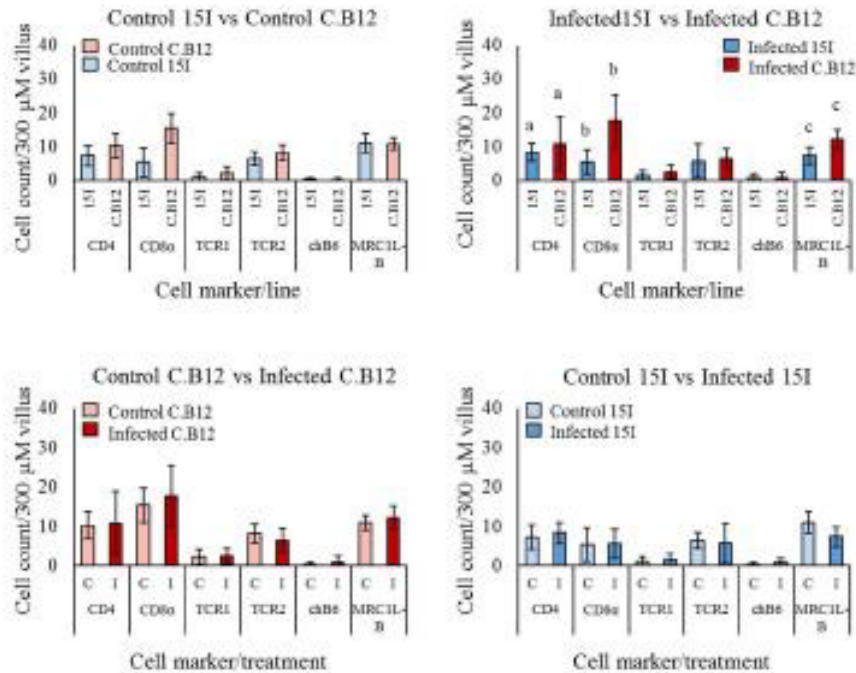

B

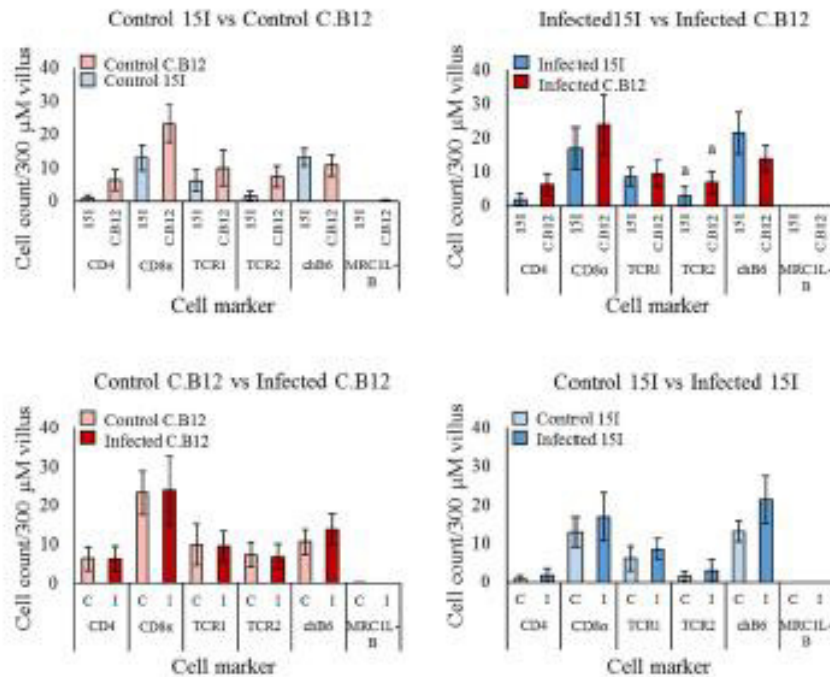

**Figure 7. Populations of CD4, CD8 $\alpha$ ,  $\gamma\delta$  T cells,  $\alpha\beta 1$  T cells,  $\alpha\beta 6$  and MRC1L-B LPLs (A) and IEL (B) in the jejunal villi of line C.B12 and line 15I chickens at 4 dpi with *E. maxima*.** Shown are data comparing control birds of both lines, infected birds of both lines, control and infected line C.B12 birds and control and infected line 15I birds. LPLs and IEL were counted from nine villi of one section per bird ( $n=3$  for uninfected C and  $n=5$  for infected groups). Each bar represents the mean number of cells per 300  $\mu\text{M}$  of villus ( $\pm$  SD). Matching letters denote significant differences between groups ( $p < 0.05$ ). C; Control. I; infected.
